# Supplementary material for: Prevalence and Concentration of Mycotoxins in Animal Feed in the Middle East and North Africa (MENA): A Systematic Review and Meta-Analysis
Source: MDPI journal article supplement (doi:10.3390/toxins15030214), 2023-03-10
Supplement: s1 [file s1]

**Table S1:** Details of data extracted from selected studies that met the inclusion criteria.

| First author | Sampl ing | Publi sh Year | Type of cereals | Type of Mycotoxin | SD      | SE     | Mean or median * of Mycotoxin level (µg/kg) | Minim um of Mycoto xin level (µg/kg) | Maxim um of Mycoto xin level (µg/kg) | Total Num ber sampl es | Num ber positi ve sampl es | Incide nce (%) | Contine nt | Coun try  | LOD (µg/kg) | LOQ (µg/kg) | Metho d | Full Citation                                                                                                                                                                                                          |
|--------------|-----------|---------------|-----------------|-------------------|---------|--------|---------------------------------------------|--------------------------------------|--------------------------------------|------------------------|----------------------------|----------------|------------|-----------|-------------|-------------|---------|------------------------------------------------------------------------------------------------------------------------------------------------------------------------------------------------------------------------|
| Demir        |           | 2010          | Fresh Corn      | Fumonisin B1      |         |        | 1330                                        | 50                                   | 14280                                | 71                     | 34                         | 48             | Asia       | Turke y   | 20          | 40          | HPLC    | DEMIR, C., SIMSEK, O. & ARICI, M. 2010. Incidence of Fusarium verticillioides and Levels of Fumonisin B-1 and B-2 in Corn in Turkey. Food Science and Biotechnology, 19, 1103-1106.                                    |
| Demir        |           | 2010          | Fresh Corn      | Fumonisin B2      |         |        | 830                                         | 50                                   | 4200                                 | 71                     | 14                         | 20             | Asia       | Turke y   | 30          | 60          | HPLC    | DEMIR, C., SIMSEK, O. & ARICI, M. 2010. Incidence of Fusarium verticillioides and Levels of Fumonisin B-1 and B-2 in Corn in Turkey. Food Science and Biotechnology, 19, 1103-1106.                                    |
| Demir        |           | 2010          | Fresh Corn      | Fumonisin s       |         |        | 1670                                        | 50                                   | 17130                                | 71                     | 34                         | 48             | Asia       | Turke y   |             |             | HPLC    | DEMIR, C., SIMSEK, O. & ARICI, M. 2010. Incidence of Fusarium verticillioides and Levels of Fumonisin B-1 and B-2 in Corn in Turkey. Food Science and Biotechnology, 19, 1103-1106.                                    |
| Demir        |           | 2010          | Stored Corn     | Fumonisin B1      |         |        | 3760                                        | 50                                   | 25170                                | 29                     | 18                         | 62             | Asia       | Turke y   | 20          | 40          | HPLC    | DEMIR, C., SIMSEK, O. & ARICI, M. 2010. Incidence of Fusarium verticillioides and Levels of Fumonisin B-1 and B-2 in Corn in Turkey. Food Science and Biotechnology, 19, 1103-1106.                                    |
| Demir        |           | 2010          | Stored Corn     | Fumonisin B2      |         |        | 1550                                        | 50                                   | 5710                                 | 29                     | 11                         | 38             | Asia       | Turke y   | 30          | 60          | HPLC    | DEMIR, C., SIMSEK, O. & ARICI, M. 2010. Incidence of Fusarium verticillioides and Levels of Fumonisin B-1 and B-2 in Corn in Turkey. Food Science and Biotechnology, 19, 1103-1106.                                    |
| Demir        |           | 2010          | Stored Corn     | Fumonisin s       |         |        | 4710                                        | 50                                   | 31430                                | 29                     | 18                         | 62             | Asia       | Turke y   |             |             | HPLC    | DEMIR, C., SIMSEK, O. & ARICI, M. 2010. Incidence of Fusarium verticillioides and Levels of Fumonisin B-1 and B-2 in Corn in Turkey. Food Science and Biotechnology, 19, 1103-1106.                                    |
| Karami       | 2004-2005 | 2010          | corn            | Deoxynival enol   |         |        | 116                                         | 54                                   | 518                                  | 60                     | 46                         | 76             | Asia       | Iran      | 10          |             | HPLC    | Karami-Osboo, R., Mirabolfathy, M., & Aliakbari, F. (2010). Natural Deoxynivalenol Contamination of Corn Produced in Golestan and Moqan Areas in Iran. Journal of Agricultural Science and Technology, 12(2), 233-239. |
| Anjum        |           | 2011          | Wheat           | Ochratoxin A      | 111.600 | 22.320 | 59.43                                       | 25                                   | 98                                   | 25                     | 7                          | 28             | Asia       | Pakist an |             |             | TLC     | Anjum, M. A., Sahota, A. W., Akram, M., & Ali, I. (2011). Prevalence of Mycotoxins in Poultry Feeds and Feed Ingriedents in Punjab (Pakistan). Journal of Animal and Plant Sciences, 21(2), 117-120.                   |
| Anjum        |           | 2011          | Maize           | Ochratoxin A      | 113.450 | 22.690 | 111.2                                       | 75                                   | 140                                  | 25                     | 10                         | 40             | Asia       | Pakist an |             |             | TLC     | Anjum, M. A., Sahota, A. W., Akram, M., & Ali, I. (2011). Prevalence of Mycotoxins in Poultry Feeds and Feed Ingriedents in Punjab (Pakistan). Journal of Animal and Plant Sciences, 21(2), 117-120.                   |
| Anjum        |           | 2011          | Rice            | Ochratoxin A      | 48.250  | 9.650  | 27.4                                        | 15                                   | 40                                   | 25                     | 5                          | 20             | Asia       | Pakist an |             |             | TLC     | Anjum, M. A., Sahota, A. W., Akram, M., & Ali, I. (2011). Prevalence of Mycotoxins in Poultry Feeds and Feed Ingriedents in Punjab (Pakistan). Journal of Animal and Plant Sciences, 21(2), 117-120.                   |

Anjum

|      |                        |              |        |        |       |    |     |    |    |    |      |          |          |                                                                                                                                                                                                      |                                                                                                                                                                                                      |
|------|------------------------|--------------|--------|--------|-------|----|-----|----|----|----|------|----------|----------|------------------------------------------------------------------------------------------------------------------------------------------------------------------------------------------------------|------------------------------------------------------------------------------------------------------------------------------------------------------------------------------------------------------|
| 2011 | Sorghum                | Ochratoxin A | 27.300 | 5.460  | 33.6  | 25 | 40  | 25 | 5  | 20 | Asia | Pakistan | TLC      | Anjum, M. A., Sahota, A. W., Akram, M., & Ali, I. (2011). Prevalence of Mycotoxins in Poultry Feeds and Feed Ingriedents in Punjab (Pakistan). Journal of Animal and Plant Sciences, 21(2), 117-120. |                                                                                                                                                                                                      |
| 2011 | Barley                 | Ochratoxin A | 43.850 | 8.770  | 30.33 | 15 | 112 | 25 | 6  | 24 | Asia | Pakistan | TLC      | Anjum, M. A., Sahota, A. W., Akram, M., & Ali, I. (2011). Prevalence of Mycotoxins in Poultry Feeds and Feed Ingriedents in Punjab (Pakistan). Journal of Animal and Plant Sciences, 21(2), 117-120. |                                                                                                                                                                                                      |
| 2011 | Peanut meal            | Ochratoxin A | 51.150 | 10.230 | 49.2  | 30 | 58  | 25 | 5  | 20 | Asia | Pakistan | TLC      | Anjum, M. A., Sahota, A. W., Akram, M., & Ali, I. (2011). Prevalence of Mycotoxins in Poultry Feeds and Feed Ingriedents in Punjab (Pakistan). Journal of Animal and Plant Sciences, 21(2), 117-120. |                                                                                                                                                                                                      |
| 2011 | Millet                 | Ochratoxin A |        |        |       | 5  | 5   | 8  | 25 | 1  | 4    | Asia     | Pakistan | TLC                                                                                                                                                                                                  | Anjum, M. A., Sahota, A. W., Akram, M., & Ali, I. (2011). Prevalence of Mycotoxins in Poultry Feeds and Feed Ingriedents in Punjab (Pakistan). Journal of Animal and Plant Sciences, 21(2), 117-120. |
| 2011 | Grams                  | Ochratoxin A | 10.250 | 2.050  | 12.67 | 10 | 15  | 25 | 3  | 12 | Asia | Pakistan | TLC      | Anjum, M. A., Sahota, A. W., Akram, M., & Ali, I. (2011). Prevalence of Mycotoxins in Poultry Feeds and Feed Ingriedents in Punjab (Pakistan). Journal of Animal and Plant Sciences, 21(2), 117-120. |                                                                                                                                                                                                      |
| 2011 | Cotton Seed meal       | Ochratoxin A | 41.054 | 9.180  | 32.33 | 20 | 42  | 20 | 3  | 15 | Asia | Pakistan | TLC      | Anjum, M. A., Sahota, A. W., Akram, M., & Ali, I. (2011). Prevalence of Mycotoxins in Poultry Feeds and Feed Ingriedents in Punjab (Pakistan). Journal of Animal and Plant Sciences, 21(2), 117-120. |                                                                                                                                                                                                      |
| 2011 | Soybean meal           | Ochratoxin A | 38.908 | 8.700  | 22.75 | 28 | 33  | 20 | 4  | 20 | Asia | Pakistan | TLC      | Anjum, M. A., Sahota, A. W., Akram, M., & Ali, I. (2011). Prevalence of Mycotoxins in Poultry Feeds and Feed Ingriedents in Punjab (Pakistan). Journal of Animal and Plant Sciences, 21(2), 117-120. |                                                                                                                                                                                                      |
| 2011 | Rape seed meal         | Ochratoxin A | 16.726 | 3.740  | 33    | 30 | 37  | 20 | 3  | 15 | Asia | Pakistan | TLC      | Anjum, M. A., Sahota, A. W., Akram, M., & Ali, I. (2011). Prevalence of Mycotoxins in Poultry Feeds and Feed Ingriedents in Punjab (Pakistan). Journal of Animal and Plant Sciences, 21(2), 117-120. |                                                                                                                                                                                                      |
| 2011 | Sun-flower meal        | Ochratoxin A | 61.671 | 13.790 | 50.33 | 15 | 68  | 20 | 6  | 30 | Asia | Pakistan | TLC      | Anjum, M. A., Sahota, A. W., Akram, M., & Ali, I. (2011). Prevalence of Mycotoxins in Poultry Feeds and Feed Ingriedents in Punjab (Pakistan). Journal of Animal and Plant Sciences, 21(2), 117-120. |                                                                                                                                                                                                      |
| 2011 | Guar meal              | Ochratoxin A | 24.150 | 5.400  | 21.75 | 20 | 30  | 20 | 4  | 20 | Asia | Pakistan | TLC      | Anjum, M. A., Sahota, A. W., Akram, M., & Ali, I. (2011). Prevalence of Mycotoxins in Poultry Feeds and Feed Ingriedents in Punjab (Pakistan). Journal of Animal and Plant Sciences, 21(2), 117-120. |                                                                                                                                                                                                      |
| 2011 | Corn gluten meal (60%) | Ochratoxin A | 45.795 | 10.240 | 32.3  | 20 | 48  | 20 | 5  | 25 | Asia | Pakistan | TLC      | Anjum, M. A., Sahota, A. W., Akram, M., & Ali, I. (2011). Prevalence of Mycotoxins in Poultry Feeds and Feed Ingriedents in Punjab (Pakistan). Journal of Animal and Plant Sciences, 21(2), 117-120. |                                                                                                                                                                                                      |
| 2011 | Corn gluten meal (30%) | Ochratoxin A | 69.005 | 15.430 | 36    | 25 | 56  | 20 | 4  | 20 | Asia | Pakistan | TLC      | Anjum, M. A., Sahota, A. W., Akram, M., & Ali, I. (2011). Prevalence of Mycotoxins in Poultry Feeds and Feed Ingriedents in Punjab (Pakistan). Journal of Animal and Plant Sciences, 21(2), 117-120. |                                                                                                                                                                                                      |
| 2011 | Rice polishing         | Ochratoxin A | 67.350 | 15.060 | 39.14 | 5  | 57  | 20 | 4  | 20 | Asia | Pakistan | TLC      | Anjum, M. A., Sahota, A. W., Akram, M., & Ali, I. (2011). Prevalence of Mycotoxins in Poultry Feeds                                                                                                  |                                                                                                                                                                                                      |

|           |      |      |            |                  |         |        |       |    |       |    |    |      |             |                        |     |     |      |                                                                                                                                                                                                                                             |
|-----------|------|------|------------|------------------|---------|--------|-------|----|-------|----|----|------|-------------|------------------------|-----|-----|------|---------------------------------------------------------------------------------------------------------------------------------------------------------------------------------------------------------------------------------------------|
| Anjum     |      | 2011 | Wheat bran | Ochratoxin A     | 27.906  | 6.240  | 11.67 | 12 | 10    | 20 | 3  | 15   | Asia        | Pakistan               |     |     | TLC  | and Feed Ingriedents in Punjab (Pakistan). Journal of Animal and Plant Sciences, 21(2), 117-120.                                                                                                                                            |
| Anjum     |      | 2011 | Fish meal  | Ochratoxin A     | 15.205  | 3.400  | 16.67 | 12 | 10    | 20 | 3  | 15   | Asia        | Pakistan               |     |     | TLC  | Anjum, M. A., Sahota, A. W., Akram, M., & Ali, I. (2011). Prevalence of Mycotoxins in Poultry Feeds and Feed Ingriedents in Punjab (Pakistan). Journal of Animal and Plant Sciences, 21(2), 117-120.                                        |
| Anjum     |      | 2011 | Blood meal | Ochratoxin A     | 17.889  | 4.000  | 14    | 12 | 10    | 20 | 3  | 15   | Asia        | Pakistan               |     |     | TLC  | Anjum, M. A., Sahota, A. W., Akram, M., & Ali, I. (2011). Prevalence of Mycotoxins in Poultry Feeds and Feed Ingriedents in Punjab (Pakistan). Journal of Animal and Plant Sciences, 21(2), 117-120.                                        |
| Anjum     |      | 2011 | Meat meal  | Ochratoxin A     | 22.361  | 5.000  | 10    | 12 | 10    | 20 | 3  | 15   | Asia        | Pakistan               |     |     | TLC  | Anjum, M. A., Sahota, A. W., Akram, M., & Ali, I. (2011). Prevalence of Mycotoxins in Poultry Feeds and Feed Ingriedents in Punjab (Pakistan). Journal of Animal and Plant Sciences, 21(2), 117-120.                                        |
| Ghiasian  | 2000 | 2011 | Maize      | Total Aflatoxins |         |        | 2.92  |    | 2.9   | 15 | 1  | 6.7  | Asia        | Iran                   | 0.1 |     | HPLC | Ghiasian, S. A., Shephard, G. S., & Yazdanpanah, H. (2011). Natural occurrence of aflatoxins from maize in Iran. Mycopathologia, 172(2), 153-160. doi:10.1007/s11046-011-9405-y                                                             |
| Ghiasian  | 2000 | 2011 | Maize      | Total Aflatoxins | 117.000 | 33.775 | 52.6  |    | 316.9 | 12 | 7  | 58.3 | Asia        | Iran                   | 0.1 |     | HPLC | Ghiasian, S. A., Shephard, G. S., & Yazdanpanah, H. (2011). Natural occurrence of aflatoxins from maize in Iran. Mycopathologia, 172(2), 153-160. doi:10.1007/s11046-011-9405-y                                                             |
| Ghiasian  | 2000 | 2011 | Maize      | Total Aflatoxins | 8.730   | 2.333  | 6.52  |    | 12.7  | 14 | 2  | 14.3 | Asia        | Iran                   | 0.1 |     | HPLC | Ghiasian, S. A., Shephard, G. S., & Yazdanpanah, H. (2011). Natural occurrence of aflatoxins from maize in Iran. Mycopathologia, 172(2), 153-160. doi:10.1007/s11046-011-9405-y                                                             |
| Ghiasian  | 2000 | 2011 | Maize      | Total Aflatoxins | 4.750   | 1.502  | 5.67  |    | 11.2  | 10 | 8  | 80   | Asia        | Iran                   | 0.1 |     | HPLC | Ghiasian, S. A., Shephard, G. S., & Yazdanpanah, H. (2011). Natural occurrence of aflatoxins from maize in Iran. Mycopathologia, 172(2), 153-160. doi:10.1007/s11046-011-9405-y                                                             |
| Ghiasian  | 2000 | 2011 | Maize      | Total Aflatoxins |         |        |       |    | 316.9 | 51 | 17 | 33   | Asia        | Iran                   | 0.1 |     | HPLC | Ghiasian, S. A., Shephard, G. S., & Yazdanpanah, H. (2011). Natural occurrence of aflatoxins from maize in Iran. Mycopathologia, 172(2), 153-160. doi:10.1007/s11046-011-9405-y                                                             |
| Rodrigues | 2009 | 2011 | Maize      | Fumonisin s      |         |        | 987   |    | 4398  | 63 | 53 | 84   | Asia/Africa | Middle East and Africa | 25  | 80  | HPLC | Rodrigues, I., Handl, J., & Binder, E. M. (2011). Mycotoxin occurrence in commodities, feeds and feed ingredients sourced in the Middle East and Africa. Food Addit Contam Part B Surveill, 4(3), 168-179. doi:10.1080/19393210.2011.589034 |
| Rodrigues | 2009 | 2011 | Maize      | Zearalenone      |         |        | 17    |    | 310   | 63 | 10 | 15   | Asia/Africa | Middle East and Africa | 10  | 25  | HPLC | Rodrigues, I., Handl, J., & Binder, E. M. (2011). Mycotoxin occurrence in commodities, feeds and feed ingredients sourced in the Middle East and Africa. Food Addit Contam Part B Surveill, 4(3), 168-179. doi:10.1080/19393210.2011.589034 |
| Rodrigues | 2009 | 2011 | Maize      | Total Aflatoxins |         |        | 28    |    | 343   | 63 | 22 | 34   | Asia/Africa | Middle East            | 0.3 | 0.8 | HPLC | Rodrigues, I., Handl, J., & Binder, E. M. (2011). Mycotoxin occurrence in commodities, feeds and feed ingredients sourced in the Middle East and                                                                                            |

|           |      |      |                      |                  |     |       |     |    |    |             |                        |     |     |      |                                                                                                                                                                                                                                             |
|-----------|------|------|----------------------|------------------|-----|-------|-----|----|----|-------------|------------------------|-----|-----|------|---------------------------------------------------------------------------------------------------------------------------------------------------------------------------------------------------------------------------------------------|
| Rodrigues | 2009 | 2011 | Wheat/wheat bran     | Fumonisin s      | 29  | 404   | 32  | 3  | 9  | Asia/Africa | and Africa             | 25  | 80  | HPLC | Africa. Food Addit Contam Part B Surveill, 4(3), 168-179. doi:10.1080/19393210.2011.589034                                                                                                                                                  |
| Rodrigues | 2009 | 2011 | Wheat/wheat bran     | Zearalenone      | 31  | 392   | 32  | 8  | 25 | Asia/Africa | Middle East and Africa | 10  | 25  | HPLC | Rodrigues, I., Handl, J., & Binder, E. M. (2011). Mycotoxin occurrence in commodities, feeds and feed ingredients sourced in the Middle East and Africa. Food Addit Contam Part B Surveill, 4(3), 168-179. doi:10.1080/19393210.2011.589034 |
| Rodrigues | 2009 | 2011 | Wheat/wheat bran     | Total Aflatoxins | 1   | 7     | 32  | 6  | 18 | Asia/Africa | Middle East and Africa | 0.3 | 0.8 | HPLC | Rodrigues, I., Handl, J., & Binder, E. M. (2011). Mycotoxin occurrence in commodities, feeds and feed ingredients sourced in the Middle East and Africa. Food Addit Contam Part B Surveill, 4(3), 168-179. doi:10.1080/19393210.2011.589034 |
| Rodrigues | 2009 | 2011 | Finished feed        | Fumonisin s      | 713 | 2588  | 119 | 99 | 83 | Asia/Africa | Middle East and Africa | 25  | 80  | HPLC | Rodrigues, I., Handl, J., & Binder, E. M. (2011). Mycotoxin occurrence in commodities, feeds and feed ingredients sourced in the Middle East and Africa. Food Addit Contam Part B Surveill, 4(3), 168-179. doi:10.1080/19393210.2011.589034 |
| Rodrigues | 2009 | 2011 | Finished feed        | Zearalenone      | 14  | 138   | 119 | 33 | 27 | Asia/Africa | Middle East and Africa | 10  | 25  | HPLC | Rodrigues, I., Handl, J., & Binder, E. M. (2011). Mycotoxin occurrence in commodities, feeds and feed ingredients sourced in the Middle East and Africa. Food Addit Contam Part B Surveill, 4(3), 168-179. doi:10.1080/19393210.2011.589034 |
| Rodrigues | 2009 | 2011 | Finished feed        | Total Aflatoxins | 24  | 213   | 119 | 50 | 42 | Asia/Africa | Middle East and Africa | 0.3 | 0.8 | HPLC | Rodrigues, I., Handl, J., & Binder, E. M. (2011). Mycotoxin occurrence in commodities, feeds and feed ingredients sourced in the Middle East and Africa. Food Addit Contam Part B Surveill, 4(3), 168-179. doi:10.1080/19393210.2011.589034 |
| Rodrigues | 2009 | 2011 | Soybean/Soybean meal | Fumonisin s      | 71  | 2035  | 33  | 4  | 12 | Asia/Africa | Middle East and Africa | 25  | 80  | HPLC | Rodrigues, I., Handl, J., & Binder, E. M. (2011). Mycotoxin occurrence in commodities, feeds and feed ingredients sourced in the Middle East and Africa. Food Addit Contam Part B Surveill, 4(3), 168-179. doi:10.1080/19393210.2011.589034 |
| Rodrigues | 2009 | 2011 | Soybean/Soybean meal | Zearalenone      | 0   | 0     | 33  | 0  | 0  | Asia/Africa | Middle East and Africa | 10  | 25  | HPLC | Rodrigues, I., Handl, J., & Binder, E. M. (2011). Mycotoxin occurrence in commodities, feeds and feed ingredients sourced in the Middle East and Africa. Food Addit Contam Part B Surveill, 4(3), 168-179. doi:10.1080/19393210.2011.589034 |
| Rodrigues | 2009 | 2011 | Soybean/Soybean meal | Total Aflatoxins | 4   | 42    | 33  | 8  | 24 | Asia/Africa | Middle East and Africa | 0.3 | 0.8 | HPLC | Rodrigues, I., Handl, J., & Binder, E. M. (2011). Mycotoxin occurrence in commodities, feeds and feed ingredients sourced in the Middle East and Africa. Food Addit Contam Part B Surveill, 4(3), 168-179. doi:10.1080/19393210.2011.589034 |
| Rodrigues | 2009 | 2011 | feed commodities     | Fumonisin s      | 528 | 10485 | 65  | 32 | 49 | Asia/Africa | Middle East and Africa | 25  | 80  | HPLC | Rodrigues, I., Handl, J., & Binder, E. M. (2011). Mycotoxin occurrence in commodities, feeds and feed ingredients sourced in the Middle East and                                                                                            |



|                |           |      |                   |                  |       |       |       |     |      |     |    |    |             |                        |      |     |       |                                                                                                                                                                                                                                                                                                                                           |
|----------------|-----------|------|-------------------|------------------|-------|-------|-------|-----|------|-----|----|----|-------------|------------------------|------|-----|-------|-------------------------------------------------------------------------------------------------------------------------------------------------------------------------------------------------------------------------------------------------------------------------------------------------------------------------------------------|
| Rodrigues      | 2009      | 2011 | feed commodities  | Zearalenone      |       |       | 32    |     | 195  | 65  | 29 | 44 | Asia/Africa | Middle East and Africa | 10   | 25  | HPLC  | Africa. Food Addit Contam Part B Surveill, 4(3), 168-179. doi:10.1080/19393210.2011.589034<br>Rodrigues, I., Handl, J., & Binder, E. M. (2011). Mycotoxin occurrence in commodities, feeds and feed ingredients sourced in the Middle East and Africa. Food Addit Contam Part B Surveill, 4(3), 168-179. doi:10.1080/19393210.2011.589034 |
| Rodrigues      | 2009      | 2011 | feed commodities  | Total Aflatoxins |       |       | 57    |     | 556  | 65  | 59 | 90 | Asia/Africa | Middle East and Africa | 0.3  | 0.8 | HPLC  | Rodrigues, I., Handl, J., & Binder, E. M. (2011). Mycotoxin occurrence in commodities, feeds and feed ingredients sourced in the Middle East and Africa. Food Addit Contam Part B Surveill, 4(3), 168-179. doi:10.1080/19393210.2011.589034                                                                                               |
| Rodrigues      | 2009      | 2011 | feed commodities  | Ochratoxin A     |       |       | 14    |     | 31   | 11  | 10 | 90 | Asia/Africa | Middle East and Africa | 0.2  | 0.5 | HPLC  | Rodrigues, I., Handl, J., & Binder, E. M. (2011). Mycotoxin occurrence in commodities, feeds and feed ingredients sourced in the Middle East and Africa. Food Addit Contam Part B Surveill, 4(3), 168-179. doi:10.1080/19393210.2011.589034                                                                                               |
| Degirmencioglu | 2007      | 2012 | Layer feed        | Total Aflatoxins | 0.200 | 0.020 | 6.5   | 0.4 | 36.8 | 100 | 13 | 13 | Asia        | Turkey                 | 1    | 2.5 | ELISA | Degirmencioglu, N., Eseceli, H., Demir, E., & Senturklu, S. (2012). Evaluation of total aflatoxin, nitrate and nitrite levels in layer feed samples of companies producing their own feed in Edincik and Bandirma province of Turkey. Food Additives & Contaminants Part B-Surveillance, 5(2), 133-139. doi:10.1080/19393210.2012.680200  |
| Degirmencioglu | 2008      | 2012 | Layer feed        | Total Aflatoxins | 0.200 | 0.020 | 7.3   | 0.5 | 47   | 100 | 15 | 15 | Asia        | Turkey                 | 1    | 2.5 | ELISA | Degirmencioglu, N., Eseceli, H., Demir, E., & Senturklu, S. (2012). Evaluation of total aflatoxin, nitrate and nitrite levels in layer feed samples of companies producing their own feed in Edincik and Bandirma province of Turkey. Food Additives & Contaminants Part B-Surveillance, 5(2), 133-139. doi:10.1080/19393210.2012.680200  |
| Abbes          | 2008-2010 | 2012 | Feed              | AFB1             | 1.400 | 0.184 | 18.66 | 5.1 | 50.1 | 58  | 49 | 84 | Africa      | Tunisia                | 0.01 |     | ELISA | Natural occurrence of aflatoxins (B-1 and M-1) in feed, plasma and raw milk of lactating dairy cows in Beja, Tunisia, using ELISA                                                                                                                                                                                                         |
| Ali            |           | 2012 | Animal feed       | Aflatoxin B1     |       |       | 16.75 |     | 100  | 20  | 12 | 60 | Africa      | Sudan                  |      |     | HPLC  | Ali, S. A., & Mohamed, A. A. (2012). Determination of Aflatoxins in Selected Foods and Animal Feed in Khartoum State, Sudan. I International Symposium on Mycotoxins in Nuts and Dried Fruits, 963, 231-235.                                                                                                                              |
| Ali            |           | 2012 | Sorghum           | Aflatoxin B1     |       |       | 6.95  |     | 125  | 35  | 15 | 42 | Africa      | Sudan                  |      |     | HPLC  | Ali, S. A., & Mohamed, A. A. (2012). Determination of Aflatoxins in Selected Foods and Animal Feed in Khartoum State, Sudan. I International Symposium on Mycotoxins in Nuts and Dried Fruits, 963, 231-235.                                                                                                                              |
| Ali            |           | 2012 | corn              | Aflatoxin B1     |       |       | 1     |     | 5    | 20  | 7  | 35 | Africa      | Sudan                  |      |     | HPLC  | Ali, S. A., & Mohamed, A. A. (2012). Determination of Aflatoxins in Selected Foods and Animal Feed in Khartoum State, Sudan. I International Symposium on Mycotoxins in Nuts and Dried Fruits, 963, 231-235.                                                                                                                              |
| Azizi          | 2009      | 2012 | Concentrated feed | Aflatoxin B1     |       |       |       |     |      | 34  | 20 | 58 | Asia        | Iran                   | 5    |     | ELISA | Azizi, I. G., Ghadi, H., & Azarmi, M. (2012). Determination of Aflatoxin B-1 Levels of the                                                                                                                                                                                                                                                |

|                                                                                                              |         |      |      |             |                 |      |      |       |     |     |       |      |          |      |     |       |                                                                                                                                                                                                                                                                                                                                                                                                                                                                   |
|--------------------------------------------------------------------------------------------------------------|---------|------|------|-------------|-----------------|------|------|-------|-----|-----|-------|------|----------|------|-----|-------|-------------------------------------------------------------------------------------------------------------------------------------------------------------------------------------------------------------------------------------------------------------------------------------------------------------------------------------------------------------------------------------------------------------------------------------------------------------------|
| <div> <div></div> <div></div> <div></div> <div></div> <div></div> <div></div> <div></div> <div></div> </div> | Azizi   | 2009 | 2012 | Beet pulp   | Aflatoxin B1    |      |      |       | 32  | 14  | 43    | Asia | Iran     | 5    |     | ELISA | Feedstuffs in Traditional and Semi-industrial Cattle Farms in Amol, Northern Iran. Asian Journal of Animal and Veterinary Advances, 7(6), 528-534. doi:10.3923/ajava.2012.528.534<br>Azizi, I. G., Ghadi, H., & Azarmi, M. (2012). Determination of Aflatoxin B-1 Levels of the Feedstuffs in Traditional and Semi-industrial Cattle Farms in Amol, Northern Iran. Asian Journal of Animal and Veterinary Advances, 7(6), 528-534. doi:10.3923/ajava.2012.528.534 |
|                                                                                                              | Azizi   | 2009 | 2012 | Cotton meal | Aflatoxin B1    |      |      |       | 30  | 8   | 26    | Asia | Iran     | 5    |     | ELISA | Feedstuffs in Traditional and Semi-industrial Cattle Farms in Amol, Northern Iran. Asian Journal of Animal and Veterinary Advances, 7(6), 528-534. doi:10.3923/ajava.2012.528.534<br>Azizi, I. G., Ghadi, H., & Azarmi, M. (2012). Determination of Aflatoxin B-1 Levels of the                                                                                                                                                                                   |
|                                                                                                              | Feizy   |      | 2012 | Cotton seed | Total Aflatoxin | 2.6  |      | 14.14 | 139 | 129 | 92    | Asia | Iran     | 0.12 | 0.2 | HPLC  | Feizy, J., Beheshti, H. R., & Asadi, M. (2012). A survey of aflatoxin in cotton seed in Iran by HPLC with on-line photochemical derivatisation and fluorescence detection. Food Additives and Contaminants: Part B Surveillance, 5(3), 200-203. doi:10.1080/19393210.2012.696148                                                                                                                                                                                  |
|                                                                                                              | Khatoon | 2007 | 2012 | Maize       | Aflatoxin B1    | 192  | 5    | 850   | 65  | 18  | 27.69 | Asia | Pakistan | 1    |     | HPTLC | Khatoon, S., Hanif, N. Q., Tahira, I., Sultana, N., Sultana, K., & Ayub, N. (2012). Natural Occurrence of Aflatoxins, Zearalenone and Trichothecenes in Maize Grown in Pakistan. Pakistan Journal of Botany, 44(1), 231-236.                                                                                                                                                                                                                                      |
|                                                                                                              | Khatoon | 2007 | 2012 | Maize       | Aflatoxin B2    | 40   | 3    | 187   | 65  | 12  | 18.46 | Asia | Pakistan | 0.5  |     | HPTLC | Khatoon, S., Hanif, N. Q., Tahira, I., Sultana, N., Sultana, K., & Ayub, N. (2012). Natural Occurrence of Aflatoxins, Zearalenone and Trichothecenes in Maize Grown in Pakistan. Pakistan Journal of Botany, 44(1), 231-236.                                                                                                                                                                                                                                      |
|                                                                                                              | Khatoon | 2007 | 2012 | Maize       | Aflatoxin G1    | 9    | 8    | 11    | 65  | 2   | 3     | Asia | Pakistan | 1    |     | HPTLC | Khatoon, S., Hanif, N. Q., Tahira, I., Sultana, N., Sultana, K., & Ayub, N. (2012). Natural Occurrence of Aflatoxins, Zearalenone and Trichothecenes in Maize Grown in Pakistan. Pakistan Journal of Botany, 44(1), 231-236.                                                                                                                                                                                                                                      |
|                                                                                                              | Khatoon | 2007 | 2012 | Maize       | Zearalenone     | 1250 | 1250 | 1250  | 65  | 1   | 1.5   | Asia | Pakistan | 125  |     | HPTLC | Khatoon, S., Hanif, N. Q., Tahira, I., Sultana, N., Sultana, K., & Ayub, N. (2012). Natural Occurrence of Aflatoxins, Zearalenone and Trichothecenes in Maize Grown in Pakistan. Pakistan Journal of Botany, 44(1), 231-236.                                                                                                                                                                                                                                      |
|                                                                                                              | Khatoon | 2007 | 2012 | Maize       | Deoxynivalenol  | 1549 | 136  | 2625  | 65  | 6   | 9.23  | Asia | Pakistan | 100  |     | HPTLC | Khatoon, S., Hanif, N. Q., Tahira, I., Sultana, N., Sultana, K., & Ayub, N. (2012). Natural Occurrence of Aflatoxins, Zearalenone and Trichothecenes in Maize Grown in Pakistan. Pakistan Journal of Botany, 44(1), 231-236.                                                                                                                                                                                                                                      |
|                                                                                                              | Khatoon | 2007 | 2012 | Maize       | HT-2 toxin      | 236  | 100  | 500   | 65  | 4   | 6.15  | Asia | Pakistan | 100  |     | HPTLC | Khatoon, S., Hanif, N. Q., Tahira, I., Sultana, N., Sultana, K., & Ayub, N. (2012). Natural Occurrence of Aflatoxins, Zearalenone and Trichothecenes in                                                                                                                                                                                                                                                                                                           |

|         |      |      |                  |                |          |         |      |     |      |    |    |      |      |          |     |       |                                                                                                                                                                                                                                                                                                      |
|---------|------|------|------------------|----------------|----------|---------|------|-----|------|----|----|------|------|----------|-----|-------|------------------------------------------------------------------------------------------------------------------------------------------------------------------------------------------------------------------------------------------------------------------------------------------------------|
| Khatoon | 2007 | 2012 | Maize            | T-2 toxin      |          |         | 506  | 143 | 1125 | 65 | 4  | 6.15 | Asia | Pakistan | 100 | HPTLC | Maize Grown in Pakistan. Pakistan Journal of Botany, 44(1), 231-236.<br>Khatoon, S., Hanif, N. Q., Tahira, I., Sultana, N., Sultana, K., & Ayub, N. (2012). Natural Occurrence of Aflatoxins, Zearalenone and Trichothecenes in Maize Grown in Pakistan. Pakistan Journal of Botany, 44(1), 231-236. |
| Oruc    | 2010 | 2012 | feed commodities | Aflatoxin B1   | 13.851   | 2.190   | 8.26 | 0.3 | 70   | 40 | 40 | 100  | Asia | Turkey   |     | ELISA | Oruc, H. H., Sorucu, A., Turkmen, II, & Arslan, E. (2012). Determination of Various Mycotoxin Concentrations in the Feedstuffs and Feed Produced by A Feed Manufacturer in Turkey. Kafkas Universitesi Veteriner Fakultesi Dergisi, 18(4), 633-638.                                                  |
| Oruc    | 2010 | 2012 | feed commodities | T-2 toxin      | 11.827   | 1.870   | 30.4 |     |      | 40 | 40 | 100  | Asia | Turkey   |     | ELISA | Oruc, H. H., Sorucu, A., Turkmen, II, & Arslan, E. (2012). Determination of Various Mycotoxin Concentrations in the Feedstuffs and Feed Produced by A Feed Manufacturer in Turkey. Kafkas Universitesi Veteriner Fakultesi Dergisi, 18(4), 633-638.                                                  |
| Oruc    | 2010 | 2012 | feed commodities | Fumonisin s    | 1517.893 | 240.000 | 510  |     |      | 40 | 32 | 80   | Asia | Turkey   |     | ELISA | Oruc, H. H., Sorucu, A., Turkmen, II, & Arslan, E. (2012). Determination of Various Mycotoxin Concentrations in the Feedstuffs and Feed Produced by A Feed Manufacturer in Turkey. Kafkas Universitesi Veteriner Fakultesi Dergisi, 18(4), 633-638.                                                  |
| Oruc    | 2010 | 2012 | feed commodities | Deoxynivalenol | 1138.420 | 180.000 | 720  |     |      | 40 | 30 | 75   | Asia | Turkey   |     | ELISA | Oruc, H. H., Sorucu, A., Turkmen, II, & Arslan, E. (2012). Determination of Various Mycotoxin Concentrations in the Feedstuffs and Feed Produced by A Feed Manufacturer in Turkey. Kafkas Universitesi Veteriner Fakultesi Dergisi, 18(4), 633-638.                                                  |
| Oruc    | 2010 | 2012 | feed commodities | Zearalenone    | 96.133   | 15.200  | 55.4 |     |      | 40 | 13 | 33   | Asia | Turkey   |     | ELISA | Oruc, H. H., Sorucu, A., Turkmen, II, & Arslan, E. (2012). Determination of Various Mycotoxin Concentrations in the Feedstuffs and Feed Produced by A Feed Manufacturer in Turkey. Kafkas Universitesi Veteriner Fakultesi Dergisi, 18(4), 633-638.                                                  |
| Rashedi | 2010 | 2012 | Maize            | Zearalenone    |          |         | 150  |     |      | 8  | 2  | 25   | Asia | Iran     |     | ELISA | Rashedi, M., Sohrabi, H. R., Ashjaazadeh, M. A., Azizi, H., & Rahimi, E. (2012). Zearalenone contamination in barley, corn, silage and wheat bran. Toxicology and Industrial Health, 28(9), 779-782. doi:10.1177/0748233711422733                                                                    |
| Rashedi | 2010 | 2012 | Barley           | Zearalenone    |          |         | 136  |     |      | 20 | 4  | 20   | Asia | Iran     |     | ELISA | Rashedi, M., Sohrabi, H. R., Ashjaazadeh, M. A., Azizi, H., & Rahimi, E. (2012). Zearalenone contamination in barley, corn, silage and wheat bran. Toxicology and Industrial Health, 28(9), 779-782. doi:10.1177/0748233711422733                                                                    |
| Rashedi | 2010 | 2012 | Silage           | Zearalenone    |          |         | 140  |     |      | 12 | 2  | 16   | Asia | Iran     |     | ELISA | Rashedi, M., Sohrabi, H. R., Ashjaazadeh, M. A., Azizi, H., & Rahimi, E. (2012). Zearalenone contamination in barley, corn, silage and wheat                                                                                                                                                         |

|         |           |      |              |                  |        |       |       |     |     |    |    |    |      |          |     |      |       |                                                                                                                                                                                                                                                                                                                           |
|---------|-----------|------|--------------|------------------|--------|-------|-------|-----|-----|----|----|----|------|----------|-----|------|-------|---------------------------------------------------------------------------------------------------------------------------------------------------------------------------------------------------------------------------------------------------------------------------------------------------------------------------|
| Rashedi | 2010      | 2012 | Wheat bran   | Zearalenone      |        |       | 0     |     |     | 14 | 0  | 0  | Asia | Iran     |     |      | ELISA | bran. Toxicology and Industrial Health, 28(9), 779-782. doi:10.1177/0748233711422733<br>Rashedi, M., Sohrabi, H. R., Ashjaazadeh, M. A., Azizi, H., & Rahimi, E. (2012). Zearalenone contamination in barley, corn, silage and wheat bran. Toxicology and Industrial Health, 28(9), 779-782. doi:10.1177/0748233711422733 |
| Rashid  | 2009-2010 | 2012 | broiler feed | Aflatoxin B1     | 24.985 | 2.550 | 47.64 | 10  | 166 | 96 | 88 | 91 | Asia | Pakistan | 3   |      | TLC   | Rashid, N., Bajwa, M. A., Rafeeq, M., Khan, M. A., Ahmad, Z., Tariq, M. M., . . . Abbas, F. (2012). Prevalence of Aflatoxin B-1 in Finished Commercial Broiler Feed from West Central Pakistan. Journal of Animal and Plant Sciences-Japs, 22(1), 6-10.                                                                   |
| Ahsan   | 2008-2009 | 2013 | Wheat grains | Aflatoxin B1     |        |       |       | 6   | 45  | 33 | 15 | 45 | Asia | Pakistan | 0.1 | 0.35 | HPLC  | Ahsan, S., Batti, I. A., Hussain, Z., Bukhari, S. A., Naqvi, S. A. R., Khan, Z. A., & Asi, M. R. (2013). HPLC Determination of Aflatoxins in Wheat Grains Collected from Central Areas of the Punjab, Pakistan. Asian Journal of Chemistry, 25(13), 7463-7466. doi:10.14233/ajchem.2013.15836                             |
| Ahsan   | 2008-2009 | 2013 | Wheat grains | Aflatoxin B2     |        |       |       | 5   | 20  | 33 | 10 | 30 | Asia | Pakistan | 0.2 | 0.6  | HPLC  | Ahsan, S., Batti, I. A., Hussain, Z., Bukhari, S. A., Naqvi, S. A. R., Khan, Z. A., & Asi, M. R. (2013). HPLC Determination of Aflatoxins in Wheat Grains Collected from Central Areas of the Punjab, Pakistan. Asian Journal of Chemistry, 25(13), 7463-7466. doi:10.14233/ajchem.2013.15836                             |
| Ahsan   | 2008-2009 | 2013 | Wheat grains | Aflatoxin G1     |        |       |       | 2   | 16  | 33 | 14 | 42 | Asia | Pakistan | 0.1 | 0.35 | HPLC  | Ahsan, S., Batti, I. A., Hussain, Z., Bukhari, S. A., Naqvi, S. A. R., Khan, Z. A., & Asi, M. R. (2013). HPLC Determination of Aflatoxins in Wheat Grains Collected from Central Areas of the Punjab, Pakistan. Asian Journal of Chemistry, 25(13), 7463-7466. doi:10.14233/ajchem.2013.15836                             |
| Ahsan   | 2008-2009 | 2013 | Wheat grains | Aflatoxin G2     |        |       |       | 0.8 | 6   | 33 | 3  | 8  | Asia | Pakistan | 0.2 | 0.6  | HPLC  | Ahsan, S., Batti, I. A., Hussain, Z., Bukhari, S. A., Naqvi, S. A. R., Khan, Z. A., & Asi, M. R. (2013). HPLC Determination of Aflatoxins in Wheat Grains Collected from Central Areas of the Punjab, Pakistan. Asian Journal of Chemistry, 25(13), 7463-7466. doi:10.14233/ajchem.2013.15836                             |
| Ahsan   | 2008-2009 | 2013 | Wheat grains | Total Aflatoxins |        |       |       | 5   | 80  | 33 | 19 | 58 | Asia | Pakistan |     |      | HPLC  | Ahsan, S., Batti, I. A., Hussain, Z., Bukhari, S. A., Naqvi, S. A. R., Khan, Z. A., & Asi, M. R. (2013). HPLC Determination of Aflatoxins in Wheat Grains Collected from Central Areas of the Punjab, Pakistan. Asian Journal of Chemistry, 25(13), 7463-7466. doi:10.14233/ajchem.2013.15836                             |
| Ahsan   | 2008-2009 | 2013 | Wheat grains | Total Aflatoxins | 5.240  | 1.353 | 52    |     |     | 15 | 12 | 80 | Asia | Pakistan |     |      | HPLC  | Ahsan, S., Batti, I. A., Hussain, Z., Bukhari, S. A., Naqvi, S. A. R., Khan, Z. A., & Asi, M. R. (2013). HPLC Determination of Aflatoxins in Wheat Grains Collected from Central Areas of the Punjab, Pakistan. Asian Journal of Chemistry, 25(13), 7463-7466. doi:10.14233/ajchem.2013.15837                             |
| Ahsan   | 2008-2009 | 2013 | Wheat grains | Total Aflatoxins | 6.050  | 1.562 | 64    |     |     | 15 | 13 | 87 | Asia | Pakistan |     |      | HPLC  | Ahsan, S., Batti, I. A., Hussain, Z., Bukhari, S. A., Naqvi, S. A. R., Khan, Z. A., & Asi, M. R. (2013). HPLC Determination of Aflatoxins in Wheat Grains                                                                                                                                                                 |



|          |           |      |              |                  |         |        |       |      |        |     |     |       |      |          |      |       |                                                                                                                                                                                                                                                                                                                                                                                                                                      |
|----------|-----------|------|--------------|------------------|---------|--------|-------|------|--------|-----|-----|-------|------|----------|------|-------|--------------------------------------------------------------------------------------------------------------------------------------------------------------------------------------------------------------------------------------------------------------------------------------------------------------------------------------------------------------------------------------------------------------------------------------|
| Ahsan    | 2008-2009 | 2013 | Whear grains | Total Aflatoxins | 3.050   | 0.964  | 85    |      |        | 10  | 8   | 80    | Asia | Pakistan |      | HPLC  | Collected from Central Areas of the Punjab, Pakistan. Asian Journal of Chemistry, 25(13), 7463-7466. doi:10.14233/ajchem.2013.15838<br>Ahsan, S., Batti, I. A., Hussain, Z., Bukhari, S. A., Naqvi, S. A. R., Khan, Z. A., & Asi, M. R. (2013). HPLC Determination of Aflatoxins in Wheat Grains Collected from Central Areas of the Punjab, Pakistan. Asian Journal of Chemistry, 25(13), 7463-7466. doi:10.14233/ajchem.2013.15839 |
| Kocasari | 2007-2008 | 2013 | Animal feed  | Total Aflatoxins | 1.260   | 0.094  | 10.72 | 3.82 | 116.83 | 180 | 108 | 60    | Asia | Turkey   |      | ELISA | Kocasari, F. S., Mor, F., Oguz, M. N., & Oguz, F. K. (2013). Occurrence of mycotoxins in feed samples in Burdur Province, Turkey. Environ Monit Assess, 185(6), 4943-4949. doi:10.1007/s10661-012-2915-3                                                                                                                                                                                                                             |
| Kocasari | 2007-2008 | 2013 | Animal feed  | T-2 toxin        | 0.880   | 0.066  | 8.87  | 3.85 | 52.36  | 180 | 85  | 47.2  | Asia | Turkey   |      | ELISA | Kocasari, F. S., Mor, F., Oguz, M. N., & Oguz, F. K. (2013). Occurrence of mycotoxins in feed samples in Burdur Province, Turkey. Environ Monit Assess, 185(6), 4943-4949. doi:10.1007/s10661-012-2915-3                                                                                                                                                                                                                             |
| Kocasari | 2007-2008 | 2013 | Animal feed  | Ochratoxin A     | 0.340   | 0.025  | 4.48  | 1.01 | 15.85  | 180 | 84  | 46.7  | Asia | Turkey   |      | ELISA | Kocasari, F. S., Mor, F., Oguz, M. N., & Oguz, F. K. (2013). Occurrence of mycotoxins in feed samples in Burdur Province, Turkey. Environ Monit Assess, 185(6), 4943-4949. doi:10.1007/s10661-012-2915-3                                                                                                                                                                                                                             |
| Kocasari | 2007-2008 | 2013 | Animal feed  | Deoxynivalenol   | 7.030   | 0.524  | 59.76 | 18.5 | 500    | 180 | 87  | 48.3  | Asia | Turkey   |      | ELISA | Kocasari, F. S., Mor, F., Oguz, M. N., & Oguz, F. K. (2013). Occurrence of mycotoxins in feed samples in Burdur Province, Turkey. Environ Monit Assess, 185(6), 4943-4949. doi:10.1007/s10661-012-2915-3                                                                                                                                                                                                                             |
| Kocasari | 2007-2008 | 2013 | Animal feed  | Zearalenone      | 0.850   | 0.063  | 7.79  | 2.1  | 29.3   | 180 | 57  | 31.7  | Asia | Turkey   |      | ELISA | Kocasari, F. S., Mor, F., Oguz, M. N., & Oguz, F. K. (2013). Occurrence of mycotoxins in feed samples in Burdur Province, Turkey. Environ Monit Assess, 185(6), 4943-4949. doi:10.1007/s10661-012-2915-3                                                                                                                                                                                                                             |
| Kocasari | 2007-2008 | 2013 | Animal feed  | Fumonisin s      | 147.000 | 10.957 | 3190  | 2690 | 4960   | 180 | 19  | 10.6  | Asia | Turkey   |      | ELISA | Kocasari, F. S., Mor, F., Oguz, M. N., & Oguz, F. K. (2013). Occurrence of mycotoxins in feed samples in Burdur Province, Turkey. Environ Monit Assess, 185(6), 4943-4949. doi:10.1007/s10661-012-2915-3                                                                                                                                                                                                                             |
| Mahmoudi | 2010-2011 | 2013 | Maize        | Total Aflatoxins | 1.249   | 0.170  | 2.79  | 0.3  | 4.93   | 54  | 8   | 14.81 | Asia | Iran     | 0.32 | HPLC  | Mahmoudi, R., Norian, R., Katiraei, F., & Pajohi Alamoti, M. R. (2013). Total aflatoxin contamination of maize produced in different regions of Qazvin-Iran. International Food Research Journal, 20(5), 2901-2904. Retrieved from https://www.scopus.com/inward/record.uri?eid=2-s2.0-84887508522&partnerID=40&md5=56bb79dc13dba8a25128eb9412793f7c                                                                                 |
| Sadegh   |           | 2013 | Animal feed  | Aflatoxin B1     | 2.140   | 0.216  | 2.311 | 0.34 | 5.81   | 98  | 33  | 36.67 | Asia | Iran     |      | HPLC  | Sadegh, M., Sani, A. M., & Ghiasvand, R. (2013). Determination of aflatoxin B1 in animal feed in Mashhad, Iran. BioTechnology: An Indian Journal, 7(9), 334-336. Retrieved from https://www.scopus.com/inward/record.uri?eid=2-s2.0-84887166842&partnerID=40&md5=c94e3c7eab055e8304c50d6594580ded                                                                                                                                    |

|       |      |      |                  |                |  |        |   |         |    |    |       |      |        |     |      |                                                                                                                                                                                                                      |
|-------|------|------|------------------|----------------|--|--------|---|---------|----|----|-------|------|--------|-----|------|----------------------------------------------------------------------------------------------------------------------------------------------------------------------------------------------------------------------|
| Bilal | 2011 | 2014 | feed commodities | Aflatoxin B1   |  | 1.02   | 0 | 11.37   | 76 | 20 | 26.32 | Asia | Turkey | 0.2 | HPLC | Bilal, T., Aksakal, D. H., Sunnetci, S., Keser, O., & Eseceli, H. (2014). Detection of Aflatoxin, Zearalenone and Deoxynivalenol in Some Feed and Feedstuffs in Turkey. Pakistan Veterinary Journal, 34(4), 459-463. |
| Bilal | 2011 | 2014 | feed commodities | Aflatoxin B2   |  | 0.13   | 0 | 1.76    | 76 | 6  | 7.89  | Asia | Turkey | 0.1 | HPLC | Bilal, T., Aksakal, D. H., Sunnetci, S., Keser, O., & Eseceli, H. (2014). Detection of Aflatoxin, Zearalenone and Deoxynivalenol in Some Feed and Feedstuffs in Turkey. Pakistan Veterinary Journal, 34(4), 459-463. |
| Bilal | 2011 | 2014 | feed commodities | Aflatoxin G1   |  | 0.04   | 0 | 1.9     | 76 | 4  | 5.26  | Asia | Turkey | 0.3 | HPLC | Bilal, T., Aksakal, D. H., Sunnetci, S., Keser, O., & Eseceli, H. (2014). Detection of Aflatoxin, Zearalenone and Deoxynivalenol in Some Feed and Feedstuffs in Turkey. Pakistan Veterinary Journal, 34(4), 459-463. |
| Bilal | 2011 | 2014 | feed commodities | Aflatoxin G2   |  | 0.01   | 0 | 0.04    | 76 | 4  | 5.26  | Asia | Turkey | 0.5 | HPLC | Bilal, T., Aksakal, D. H., Sunnetci, S., Keser, O., & Eseceli, H. (2014). Detection of Aflatoxin, Zearalenone and Deoxynivalenol in Some Feed and Feedstuffs in Turkey. Pakistan Veterinary Journal, 34(4), 459-463. |
| Bilal | 2011 | 2014 | Animal feed      | Aflatoxin B1   |  | 0.26   | 0 | 3.31    | 30 | 17 | 56.6  | Asia | Turkey | 0.6 | HPLC | Bilal, T., Aksakal, D. H., Sunnetci, S., Keser, O., & Eseceli, H. (2014). Detection of Aflatoxin, Zearalenone and Deoxynivalenol in Some Feed and Feedstuffs in Turkey. Pakistan Veterinary Journal, 34(4), 459-463. |
| Bilal | 2011 | 2014 | Animal feed      | Aflatoxin B2   |  | 0.01   | 0 | 0.31    | 30 | 1  | 3.33  | Asia | Turkey | 0.4 | HPLC | Bilal, T., Aksakal, D. H., Sunnetci, S., Keser, O., & Eseceli, H. (2014). Detection of Aflatoxin, Zearalenone and Deoxynivalenol in Some Feed and Feedstuffs in Turkey. Pakistan Veterinary Journal, 34(4), 459-463. |
| Bilal | 2011 | 2014 | Animal feed      | Aflatoxin G1   |  | 0.3    | 0 | 1.1     | 30 | 9  | 30    | Asia | Turkey | 0.8 | HPLC | Bilal, T., Aksakal, D. H., Sunnetci, S., Keser, O., & Eseceli, H. (2014). Detection of Aflatoxin, Zearalenone and Deoxynivalenol in Some Feed and Feedstuffs in Turkey. Pakistan Veterinary Journal, 34(4), 459-463. |
| Bilal | 2011 | 2014 | Animal feed      | Aflatoxin G2   |  | 0.11   | 0 | 0.67    | 30 | 1  | 3.3   | Asia | Turkey | 0.8 | HPLC | Bilal, T., Aksakal, D. H., Sunnetci, S., Keser, O., & Eseceli, H. (2014). Detection of Aflatoxin, Zearalenone and Deoxynivalenol in Some Feed and Feedstuffs in Turkey. Pakistan Veterinary Journal, 34(4), 459-463. |
| Bilal | 2011 | 2014 | feed commodities | Zearalenone    |  | 7.34   | 0 | 96.61   | 76 | 24 | 31.58 | Asia | Turkey | 15  | HPLC | Bilal, T., Aksakal, D. H., Sunnetci, S., Keser, O., & Eseceli, H. (2014). Detection of Aflatoxin, Zearalenone and Deoxynivalenol in Some Feed and Feedstuffs in Turkey. Pakistan Veterinary Journal, 34(4), 459-463. |
| Bilal | 2011 | 2014 | feed commodities | Deoxynivalenol |  | 423.17 | 0 | 4769.63 | 76 | 14 | 18.42 | Asia | Turkey | 250 | HPLC | Bilal, T., Aksakal, D. H., Sunnetci, S., Keser, O., & Eseceli, H. (2014). Detection of Aflatoxin, Zearalenone and Deoxynivalenol in Some Feed and Feedstuffs in Turkey. Pakistan Veterinary Journal, 34(4), 459-463. |

|                  |      |      |                          |                  |        |       |       |     |       |    |    |       |      |          |       |       |                                                                                                                                                                                                                      |                                                                                                                                                                                                                                                              |
|------------------|------|------|--------------------------|------------------|--------|-------|-------|-----|-------|----|----|-------|------|----------|-------|-------|----------------------------------------------------------------------------------------------------------------------------------------------------------------------------------------------------------------------|--------------------------------------------------------------------------------------------------------------------------------------------------------------------------------------------------------------------------------------------------------------|
| Bilal            | 2011 | 2014 | Animal feed              | Zearalenone      |        |       | 13.4  | 0   | 37.72 | 30 | 22 | 73.33 | Asia | Turkey   | 15    | HPLC  | Bilal, T., Aksakal, D. H., Sunnetci, S., Keser, O., & Eseceli, H. (2014). Detection of Aflatoxin, Zearalenone and Deoxynivalenol in Some Feed and Feedstuffs in Turkey. Pakistan Veterinary Journal, 34(4), 459-463. |                                                                                                                                                                                                                                                              |
| Bilal            | 2011 | 2014 | Animal feed              | Deoxynivalenol   |        |       | 62.85 | 0   | 486.2 | 30 | 13 | 43.33 | Asia | Turkey   | 200   | HPLC  | Bilal, T., Aksakal, D. H., Sunnetci, S., Keser, O., & Eseceli, H. (2014). Detection of Aflatoxin, Zearalenone and Deoxynivalenol in Some Feed and Feedstuffs in Turkey. Pakistan Veterinary Journal, 34(4), 459-463. |                                                                                                                                                                                                                                                              |
| Eskandari        | 2012 | 2014 | Animal feed              | Aflatoxin B1     |        |       | 26.4  | 15  | 35    | 40 | 40 | 100   | Asia | Iran     | 0.05  | HPLC  | Eskandari, M. H., & Pakfetrat, S. (2014). Aflatoxins and heavy metals in animal feed in Iran. Food Addit Contam Part B Surveill, 7(3), 202-207. doi:10.1080/19393210.2013.876675                                     |                                                                                                                                                                                                                                                              |
| Eskandari        | 2012 | 2014 | Animal feed              | Aflatoxin B2     |        |       | 15.4  | 5   | 25    | 40 | 40 | 100   | Asia | Iran     | 0.015 | HPLC  | Eskandari, M. H., & Pakfetrat, S. (2014). Aflatoxins and heavy metals in animal feed in Iran. Food Addit Contam Part B Surveill, 7(3), 202-207. doi:10.1080/19393210.2013.876675                                     |                                                                                                                                                                                                                                                              |
| Eskandari        | 2012 | 2014 | Animal feed              | Aflatoxin G1     |        |       | 11.7  |     | 30    | 40 | 38 | 95    | Asia | Iran     | 0.03  | HPLC  | Eskandari, M. H., & Pakfetrat, S. (2014). Aflatoxins and heavy metals in animal feed in Iran. Food Addit Contam Part B Surveill, 7(3), 202-207. doi:10.1080/19393210.2013.876675                                     |                                                                                                                                                                                                                                                              |
| Eskandari        | 2012 | 2014 | Animal feed              | Aflatoxin G2     |        |       | 4.9   |     | 16    | 40 | 30 | 75    | Asia | Iran     | 0.015 | HPLC  | Eskandari, M. H., & Pakfetrat, S. (2014). Aflatoxins and heavy metals in animal feed in Iran. Food Addit Contam Part B Surveill, 7(3), 202-207. doi:10.1080/19393210.2013.876675                                     |                                                                                                                                                                                                                                                              |
| Eskandari        | 2012 | 2014 | Animal feed              | Total Aflatoxins |        |       | 58.5  | 28  | 90    | 40 | 40 | 100   | Asia | Iran     |       | HPLC  | Eskandari, M. H., & Pakfetrat, S. (2014). Aflatoxins and heavy metals in animal feed in Iran. Food Addit Contam Part B Surveill, 7(3), 202-207. doi:10.1080/19393210.2013.876675                                     |                                                                                                                                                                                                                                                              |
| Gholampour Azizi | 2013 | 2014 | Cattle feed commodities  | T-2 toxin        | 11.690 | 1.509 | 11.45 | 0.1 | 53.5  | 60 | 7  | 11.7  | Asia | Iran     |       | ELISA | Gholampour Azizi, I., Azarmi, M., Danesh Pouya, N., & Rouhi, S. (2014). T-2 toxin Analysis in Poultry and Cattle Feedstuff. Jundishapur J Nat Pharm Prod, 9(2), e13734. doi:10.17795/jjnpp-13734                     |                                                                                                                                                                                                                                                              |
| Gholampour Azizi | 2013 | 2014 | poultry feed commodities | T-2 toxin        | 10.160 | 1.855 | 11.76 | 0.1 | 27.5  | 30 | 3  | 10    | Asia | Iran     |       | ELISA | Gholampour Azizi, I., Azarmi, M., Danesh Pouya, N., & Rouhi, S. (2014). T-2 toxin Analysis in Poultry and Cattle Feedstuff. Jundishapur J Nat Pharm Prod, 9(2), e13734. doi:10.17795/jjnpp-13734                     |                                                                                                                                                                                                                                                              |
| Shar             |      | 2014 | Layer feed               | Total Aflatoxins |        |       | 20    |     | 72    | 43 | 22 | 51    | Asia | Pakistan | 0.5   | 2     | HPLC                                                                                                                                                                                                                 | Shar, Z. H., Sumbal, G. A., Sherazi, S. T., Bhanger, M. I., & Nizamani, S. M. (2014). Natural co-occurrence of aflatoxins and deoxynivalenol in poultry feed in Pakistan. Food Addit Contam Part B Surveill, 7(3), 162-167. doi:10.1080/19393210.2013.867904 |
| Shar             |      | 2014 | Broiler Starter (Mesh)   | Total Aflatoxins |        |       | 19    |     | 55    | 38 | 15 | 39    | Asia | Pakistan | 0.5   | 2     | HPLC                                                                                                                                                                                                                 | Shar, Z. H., Sumbal, G. A., Sherazi, S. T., Bhanger, M. I., & Nizamani, S. M. (2014). Natural co-occurrence of aflatoxins and deoxynivalenol in poultry feed in Pakistan. Food Addit Contam Part B Surveill, 7(3), 162-167. doi:10.1080/19393210.2013.867904 |

|         |           |                          |                  |              |        |       |      |      |     |    |    |      |          |          |     |      |                                                                                                                                                                                                                                                              |                                                                                                                                                             |
|---------|-----------|--------------------------|------------------|--------------|--------|-------|------|------|-----|----|----|------|----------|----------|-----|------|--------------------------------------------------------------------------------------------------------------------------------------------------------------------------------------------------------------------------------------------------------------|-------------------------------------------------------------------------------------------------------------------------------------------------------------|
| Shar    | 2014      | Broiler Finisher (Mesh)  | Total Aflatoxins |              |        | 20    |      | 50   | 39  | 17 | 43 | Asia | Pakistan | 0.5      | 2   | HPLC | Shar, Z. H., Sumbal, G. A., Sherazi, S. T., Bhanger, M. I., & Nizamani, S. M. (2014). Natural co-occurrence of aflatoxins and deoxynivalenol in poultry feed in Pakistan. Food Addit Contam Part B Surveill, 7(3), 162-167. doi:10.1080/19393210.2013.867904 |                                                                                                                                                             |
|         |           | Broiler Starter (Crumb)  | Total Aflatoxins |              |        | 27    |      | 77   | 47  | 25 | 53 | Asia | Pakistan | 0.5      | 2   | HPLC | Shar, Z. H., Sumbal, G. A., Sherazi, S. T., Bhanger, M. I., & Nizamani, S. M. (2014). Natural co-occurrence of aflatoxins and deoxynivalenol in poultry feed in Pakistan. Food Addit Contam Part B Surveill, 7(3), 162-167. doi:10.1080/19393210.2013.867904 |                                                                                                                                                             |
|         |           | Broiler Finisher (Crumb) | Total Aflatoxins |              |        | 25    |      | 80   | 48  | 21 | 43 | Asia | Pakistan | 0.5      | 2   | HPLC | Shar, Z. H., Sumbal, G. A., Sherazi, S. T., Bhanger, M. I., & Nizamani, S. M. (2014). Natural co-occurrence of aflatoxins and deoxynivalenol in poultry feed in Pakistan. Food Addit Contam Part B Surveill, 7(3), 162-167. doi:10.1080/19393210.2013.867904 |                                                                                                                                                             |
|         |           | Layer feed               | Deoxynivalenol   |              |        | 671   |      | 1200 | 43  | 24 | 48 | Asia | Pakistan | 5        | 15  | HPLC | Shar, Z. H., Sumbal, G. A., Sherazi, S. T., Bhanger, M. I., & Nizamani, S. M. (2014). Natural co-occurrence of aflatoxins and deoxynivalenol in poultry feed in Pakistan. Food Addit Contam Part B Surveill, 7(3), 162-167. doi:10.1080/19393210.2013.867904 |                                                                                                                                                             |
|         |           | Broiler Starter (Mesh)   | Deoxynivalenol   |              |        | 592   |      | 900  | 38  | 17 | 44 | Asia | Pakistan | 5        | 15  | HPLC | Shar, Z. H., Sumbal, G. A., Sherazi, S. T., Bhanger, M. I., & Nizamani, S. M. (2014). Natural co-occurrence of aflatoxins and deoxynivalenol in poultry feed in Pakistan. Food Addit Contam Part B Surveill, 7(3), 162-167. doi:10.1080/19393210.2013.867904 |                                                                                                                                                             |
|         |           | Broiler Finisher (Mesh)  | Deoxynivalenol   |              |        | 573   |      | 1250 | 39  | 21 | 53 | Asia | Pakistan | 5        | 15  | HPLC | Shar, Z. H., Sumbal, G. A., Sherazi, S. T., Bhanger, M. I., & Nizamani, S. M. (2014). Natural co-occurrence of aflatoxins and deoxynivalenol in poultry feed in Pakistan. Food Addit Contam Part B Surveill, 7(3), 162-167. doi:10.1080/19393210.2013.867904 |                                                                                                                                                             |
|         |           | Broiler Starter (Crumb)  | Deoxynivalenol   |              |        | 798   |      | 1400 | 47  | 30 | 63 | Asia | Pakistan | 5        | 15  | HPLC | Shar, Z. H., Sumbal, G. A., Sherazi, S. T., Bhanger, M. I., & Nizamani, S. M. (2014). Natural co-occurrence of aflatoxins and deoxynivalenol in poultry feed in Pakistan. Food Addit Contam Part B Surveill, 7(3), 162-167. doi:10.1080/19393210.2013.867904 |                                                                                                                                                             |
|         |           | Broiler Finisher (Crumb) | Deoxynivalenol   |              |        | 940   |      | 1600 | 48  | 22 | 45 | Asia | Pakistan | 5        | 15  | HPLC | Shar, Z. H., Sumbal, G. A., Sherazi, S. T., Bhanger, M. I., & Nizamani, S. M. (2014). Natural co-occurrence of aflatoxins and deoxynivalenol in poultry feed in Pakistan. Food Addit Contam Part B Surveill, 7(3), 162-167. doi:10.1080/19393210.2013.867904 |                                                                                                                                                             |
| Sherazi | 2013-2014 | 2015                     | Wheat            | Ochratoxin A | 44.700 | 7.556 | 65.1 | 10   | 134 | 35 | 9  | 36   | Asia     | Pakistan | 0.2 | 0.6  | HPLC                                                                                                                                                                                                                                                         | Sherazi, S. T., Shar, Z. H., Sumbal, G. A., Tan, E. T., Bhanger, M. I., Kara, H., & Nizamani, S. M. (2015). Occurrence of ochratoxin A in poultry feeds and |

|         |           |      |                  |              |        |        |      |    |     |    |    |      |      |          |     |     |      |                                                                                                                                                                                                                                                                                                                                               |
|---------|-----------|------|------------------|--------------|--------|--------|------|----|-----|----|----|------|------|----------|-----|-----|------|-----------------------------------------------------------------------------------------------------------------------------------------------------------------------------------------------------------------------------------------------------------------------------------------------------------------------------------------------|
| Sherazi | 2013-2014 | 2015 | Maize            | Ochratoxin A | 58.700 | 10.717 | 80.8 | 18 | 180 | 30 | 12 | 40   | Asia | Pakistan | 0.2 | 0.6 | HPLC | feed ingredients from Pakistan. Mycotoxin Res, 31(1), 1-7. doi:10.1007/s12550-014-0216-0 Sherazi, S. T., Shar, Z. H., Sumbal, G. A., Tan, E. T., Bhanger, M. I., Kara, H., & Nizamani, S. M. (2015). Occurrence of ochratoxin A in poultry feeds and feed ingredients from Pakistan. Mycotoxin Res, 31(1), 1-7. doi:10.1007/s12550-014-0216-0 |
| Sherazi | 2013-2014 | 2015 | Rice             | Ochratoxin A | 35.400 | 6.463  | 57.2 | 10 | 120 | 30 | 9  | 30   | Asia | Pakistan | 0.2 | 0.6 | HPLC | Sherazi, S. T., Shar, Z. H., Sumbal, G. A., Tan, E. T., Bhanger, M. I., Kara, H., & Nizamani, S. M. (2015). Occurrence of ochratoxin A in poultry feeds and feed ingredients from Pakistan. Mycotoxin Res, 31(1), 1-7. doi:10.1007/s12550-014-0216-0                                                                                          |
| Sherazi | 2013-2014 | 2015 | Sorghum          | Ochratoxin A | 48.800 | 10.404 | 50   | 17 | 115 | 22 | 7  | 31.8 | Asia | Pakistan | 0.2 | 0.6 | HPLC | Sherazi, S. T., Shar, Z. H., Sumbal, G. A., Tan, E. T., Bhanger, M. I., Kara, H., & Nizamani, S. M. (2015). Occurrence of ochratoxin A in poultry feeds and feed ingredients from Pakistan. Mycotoxin Res, 31(1), 1-7. doi:10.1007/s12550-014-0216-0                                                                                          |
| Sherazi | 2013-2014 | 2015 | Sunflower meal   | Ochratoxin A | 37.900 | 8.270  | 52.5 | 14 | 60  | 21 | 6  | 28.5 | Asia | Pakistan | 0.2 | 0.6 | HPLC | Sherazi, S. T., Shar, Z. H., Sumbal, G. A., Tan, E. T., Bhanger, M. I., Kara, H., & Nizamani, S. M. (2015). Occurrence of ochratoxin A in poultry feeds and feed ingredients from Pakistan. Mycotoxin Res, 31(1), 1-7. doi:10.1007/s12550-014-0216-0                                                                                          |
| Sherazi | 2013-2014 | 2015 | Guar meal        | Ochratoxin A | 19.200 | 4.657  | 39.3 | 15 | 60  | 17 | 6  | 35.2 | Asia | Pakistan | 0.2 | 0.6 | HPLC | Sherazi, S. T., Shar, Z. H., Sumbal, G. A., Tan, E. T., Bhanger, M. I., Kara, H., & Nizamani, S. M. (2015). Occurrence of ochratoxin A in poultry feeds and feed ingredients from Pakistan. Mycotoxin Res, 31(1), 1-7. doi:10.1007/s12550-014-0216-0                                                                                          |
| Sherazi | 2013-2014 | 2015 | Cotton Seed meal | Ochratoxin A | 21.900 | 5.162  | 41   | 19 | 80  | 18 | 5  | 27.7 | Asia | Pakistan | 0.2 | 0.6 | HPLC | Sherazi, S. T., Shar, Z. H., Sumbal, G. A., Tan, E. T., Bhanger, M. I., Kara, H., & Nizamani, S. M. (2015). Occurrence of ochratoxin A in poultry feeds and feed ingredients from Pakistan. Mycotoxin Res, 31(1), 1-7. doi:10.1007/s12550-014-0216-0                                                                                          |
| Sherazi | 2013-2014 | 2015 | Corn gluten meal | Ochratoxin A | 24.100 | 5.529  | 53.8 | 12 | 35  | 19 | 6  | 31.5 | Asia | Pakistan | 0.2 | 0.6 | HPLC | Sherazi, S. T., Shar, Z. H., Sumbal, G. A., Tan, E. T., Bhanger, M. I., Kara, H., & Nizamani, S. M. (2015). Occurrence of ochratoxin A in poultry feeds and feed ingredients from Pakistan. Mycotoxin Res, 31(1), 1-7. doi:10.1007/s12550-014-0216-0                                                                                          |
| Sherazi | 2013-2014 | 2015 | Wheat bran       | Ochratoxin A | 10.100 | 2.153  | 22.5 | 12 | 35  | 22 | 6  | 27.2 | Asia | Pakistan | 0.2 | 0.6 | HPLC | Sherazi, S. T., Shar, Z. H., Sumbal, G. A., Tan, E. T., Bhanger, M. I., Kara, H., & Nizamani, S. M. (2015). Occurrence of ochratoxin A in poultry feeds and feed ingredients from Pakistan. Mycotoxin Res, 31(1), 1-7. doi:10.1007/s12550-014-0216-0                                                                                          |
| Sherazi | 2013-2014 | 2015 | Barley           | Ochratoxin A | 54.600 | 9.969  | 65.2 | 20 | 160 | 30 | 10 | 33.3 | Asia | Pakistan | 0.2 | 0.6 | HPLC | Sherazi, S. T., Shar, Z. H., Sumbal, G. A., Tan, E. T., Bhanger, M. I., Kara, H., & Nizamani, S. M. (2015). Occurrence of ochratoxin A in poultry feeds and feed ingredients from Pakistan. Mycotoxin Res, 31(1), 1-7. doi:10.1007/s12550-014-0216-0                                                                                          |
| Sherazi | 2013-2014 | 2015 | Peanut meal      | Ochratoxin A | 33.700 | 8.425  | 53.8 | 14 | 110 | 16 | 5  | 31.2 | Asia | Pakistan | 0.2 | 0.6 | HPLC | Sherazi, S. T., Shar, Z. H., Sumbal, G. A., Tan, E. T., Bhanger, M. I., Kara, H., & Nizamani, S. M. (2015). Occurrence of ochratoxin A in poultry feeds and                                                                                                                                                                                   |



|         |           |      |                          |                  |        |        |      |      |      |     |    |      |      |          |       |       |      |                                                                                                                                                                                                                                                                                                                                                  |
|---------|-----------|------|--------------------------|------------------|--------|--------|------|------|------|-----|----|------|------|----------|-------|-------|------|--------------------------------------------------------------------------------------------------------------------------------------------------------------------------------------------------------------------------------------------------------------------------------------------------------------------------------------------------|
| Sherazi | 2013-2014 | 2015 | Millet                   | Ochratoxin A     | 23.600 | 5.563  | 37.8 | 15   | 65   | 18  | 4  | 22.2 | Asia | Pakistan | 0.2   | 0.6   | HPLC | feed ingredients from Pakistan. Mycotoxin Res, 31(1), 1-7. doi:10.1007/s12550-014-0216-0<br>Sherazi, S. T., Shar, Z. H., Sumbal, G. A., Tan, E. T., Bhanger, M. I., Kara, H., & Nizamani, S. M. (2015). Occurrence of ochratoxin A in poultry feeds and feed ingredients from Pakistan. Mycotoxin Res, 31(1), 1-7. doi:10.1007/s12550-014-0216-0 |
| Sherazi | 2013-2014 | 2015 | Broiler Starter (Mesh)   | Ochratoxin A     | 49.300 | 11.024 | 66   | 22   | 150  | 20  | 6  | 30   | Asia | Pakistan | 0.2   | 0.6   | HPLC | Sherazi, S. T., Shar, Z. H., Sumbal, G. A., Tan, E. T., Bhanger, M. I., Kara, H., & Nizamani, S. M. (2015). Occurrence of ochratoxin A in poultry feeds and feed ingredients from Pakistan. Mycotoxin Res, 31(1), 1-7. doi:10.1007/s12550-014-0216-0                                                                                             |
| Sherazi | 2013-2014 | 2015 | Broiler Finisher (Mesh)  | Ochratoxin A     | 44.300 | 9.906  | 56   | 22   | 157  | 20  | 9  | 45   | Asia | Pakistan | 0.2   | 0.6   | HPLC | Sherazi, S. T., Shar, Z. H., Sumbal, G. A., Tan, E. T., Bhanger, M. I., Kara, H., & Nizamani, S. M. (2015). Occurrence of ochratoxin A in poultry feeds and feed ingredients from Pakistan. Mycotoxin Res, 31(1), 1-7. doi:10.1007/s12550-014-0216-0                                                                                             |
| Sherazi | 2013-2014 | 2015 | Broiler Starter (Crumb)  | Ochratoxin A     | 41.200 | 9.213  | 79   | 30   | 140  | 20  | 8  | 40   | Asia | Pakistan | 0.2   | 0.6   | HPLC | Sherazi, S. T., Shar, Z. H., Sumbal, G. A., Tan, E. T., Bhanger, M. I., Kara, H., & Nizamani, S. M. (2015). Occurrence of ochratoxin A in poultry feeds and feed ingredients from Pakistan. Mycotoxin Res, 31(1), 1-7. doi:10.1007/s12550-014-0216-0                                                                                             |
| Sherazi | 2013-2014 | 2015 | Broiler Finisher (Crumb) | Ochratoxin A     | 67.000 | 14.982 | 85   | 22   | 190  | 20  | 7  | 35   | Asia | Pakistan | 0.2   | 0.6   | HPLC | Sherazi, S. T., Shar, Z. H., Sumbal, G. A., Tan, E. T., Bhanger, M. I., Kara, H., & Nizamani, S. M. (2015). Occurrence of ochratoxin A in poultry feeds and feed ingredients from Pakistan. Mycotoxin Res, 31(1), 1-7. doi:10.1007/s12550-014-0216-0                                                                                             |
| Namjoo  | 2009-2010 | 2016 | Wheat Silage             | Total Aflatoxins | 0.670  | 0.115  | 1.83 |      | 7.08 | 34  | 10 | 29   | Asia | Iran     |       |       | HPLC | NAMJOO, M., SALAMAT, F., RAJABLI, N., HAJIHOSEINI, R., NIKNEJAD, F., KOHSAR, F. & JOSHAGHANI, H. 2016. Quantitative Determination of Aflatoxin by High Performance Liquid Chromatography in Wheat Silos in Golestan Province, North of Iran. Iran J Public Health, 45, 905-10.                                                                   |
| Asghar  | 2014      | 2016 | Wheat                    | Aflatoxin B1     | 0.320  | 0.024  | 0.51 | 0.05 | 4.78 | 185 | 48 | 26   | Asia | Pakistan | 0.031 | 0.093 | HPLC | Asghar, M. A., Ahmed, A., Iqbal, J., Zahir, E., & Nauman, H. (2016). Fungal flora and aflatoxin contamination in Pakistani wheat kernels (Triticum aestivum L.) and their attribution in seed germination. J Food Drug Anal, 24(3), 635-643. doi:10.1016/j.jfda.2016.02.001                                                                      |
| Asghar  | 2014      | 2016 | Wheat                    | Aflatoxin B2     | 0.080  | 0.006  | 0.02 | 0.02 | 0.48 | 185 | 13 | 7    | Asia | Pakistan | 0.022 | 0.066 | HPLC | Asghar, M. A., Ahmed, A., Iqbal, J., Zahir, E., & Nauman, H. (2016). Fungal flora and aflatoxin contamination in Pakistani wheat kernels (Triticum aestivum L.) and their attribution in seed germination. J Food Drug Anal, 24(3), 635-643. doi:10.1016/j.jfda.2016.02.001                                                                      |
| Asghar  | 2014      | 2016 | Wheat                    | Aflatoxin G1     |        |        | 0    | 0    | 0    | 185 | 0  | 0    | Asia | Pakistan | 0.032 | 0.096 | HPLC | Asghar, M. A., Ahmed, A., Iqbal, J., Zahir, E., & Nauman, H. (2016). Fungal flora and aflatoxin contamination in Pakistani wheat kernels (Triticum aestivum L.) and their attribution in seed                                                                                                                                                    |

|         |      |      |             |                  |       |       |      |       |      |     |    |      |      |          |       |       |      |                                                                                                                                                                                                                                                                             |
|---------|------|------|-------------|------------------|-------|-------|------|-------|------|-----|----|------|------|----------|-------|-------|------|-----------------------------------------------------------------------------------------------------------------------------------------------------------------------------------------------------------------------------------------------------------------------------|
| Asghar  | 2014 | 2016 | Wheat       | Aflatoxin G2     |       |       | 0    | 0     | 0    | 185 | 0  | 0    | Asia | Pakistan | 0.028 | 0.084 | HPLC | germination. J Food Drug Anal, 24(3), 635-643. doi:10.1016/j.jfda.2016.02.002                                                                                                                                                                                               |
| Asghar  | 2014 | 2016 | Wheat       | Total Aflatoxins | 0.400 | 0.029 | 0.53 | 0.02  | 5.26 | 185 | 48 | 26   | Asia | Pakistan | 0.091 | 0.273 | HPLC | Asghar, M. A., Ahmed, A., Iqbal, J., Zahir, E., & Nauman, H. (2016). Fungal flora and aflatoxin contamination in Pakistani wheat kernels (Triticum aestivum L.) and their attribution in seed germination. J Food Drug Anal, 24(3), 635-643. doi:10.1016/j.jfda.2016.02.003 |
| Bahrami | 2014 | 2016 | Barley      | Aflatoxin B1     | 0.270 | 0.043 | 0.6  | 0.12  | 1.01 | 40  | 36 | 90   | Asia | Iran     | 0.12  | 0.4   | HPLC | Asghar, M. A., Ahmed, A., Iqbal, J., Zahir, E., & Nauman, H. (2016). Fungal flora and aflatoxin contamination in Pakistani wheat kernels (Triticum aestivum L.) and their attribution in seed germination. J Food Drug Anal, 24(3), 635-643. doi:10.1016/j.jfda.2016.02.001 |
| Bahrami | 2014 | 2016 | Barley      | Aflatoxin B2     | 0.190 | 0.030 | 0.24 | 0.015 | 0.61 | 40  | 29 | 72.5 | Asia | Iran     | 0.015 | 0.05  | HPLC | Bahrami, R., Shahbazi, Y., & Nikousefat, Z. (2016). Occurrence and seasonal variation of aflatoxin in dairy cow feed with estimation of aflatoxin M-1 in milk from Iran. Food and Agricultural Immunology, 27(3), 388-400. doi:10.1080/09540105.2015.1109613                |
| Bahrami | 2014 | 2016 | Barley      | Aflatoxin G1     | 0.100 | 0.016 | 0.13 | 0.05  | 0.41 | 40  | 19 | 47.5 | Asia | Iran     | 0.05  | 0.16  | HPLC | Bahrami, R., Shahbazi, Y., & Nikousefat, Z. (2016). Occurrence and seasonal variation of aflatoxin in dairy cow feed with estimation of aflatoxin M-1 in milk from Iran. Food and Agricultural Immunology, 27(3), 388-400. doi:10.1080/09540105.2015.1109613                |
| Bahrami | 2014 | 2016 | Barley      | Aflatoxin G2     | 0.050 | 0.008 | 0.07 | 0.03  | 0.2  | 40  | 19 | 47.5 | Asia | Iran     | 0.03  | 0.1   | HPLC | Bahrami, R., Shahbazi, Y., & Nikousefat, Z. (2016). Occurrence and seasonal variation of aflatoxin in dairy cow feed with estimation of aflatoxin M-1 in milk from Iran. Food and Agricultural Immunology, 27(3), 388-400. doi:10.1080/09540105.2015.1109613                |
| Bahrami | 2014 | 2016 | Corn silage | Aflatoxin G1     | 1.870 | 0.296 | 2.6  | 0.05  | 6.04 | 40  | 28 | 70   | Asia | Iran     | 0.05  | 0.16  | HPLC | Bahrami, R., Shahbazi, Y., & Nikousefat, Z. (2016). Occurrence and seasonal variation of aflatoxin in dairy cow feed with estimation of aflatoxin M-1 in milk from Iran. Food and Agricultural Immunology, 27(3), 388-400. doi:10.1080/09540105.2015.1109614                |
| Bahrami | 2014 | 2016 | Corn silage | Aflatoxin G2     | 0.930 | 0.147 | 1.3  | 0.03  | 2.9  | 40  | 28 | 70   | Asia | Iran     | 0.03  | 0.1   | HPLC | Bahrami, R., Shahbazi, Y., & Nikousefat, Z. (2016). Occurrence and seasonal variation of aflatoxin in dairy cow feed with estimation of aflatoxin M-1 in milk from Iran. Food and Agricultural Immunology, 27(3), 388-400. doi:10.1080/09540105.2015.1109615                |

|         |      |      |             |              |       |       |      |       |      |    |    |     |      |      |       |      |      |                                                                                                                                                                                                                                                              |
|---------|------|------|-------------|--------------|-------|-------|------|-------|------|----|----|-----|------|------|-------|------|------|--------------------------------------------------------------------------------------------------------------------------------------------------------------------------------------------------------------------------------------------------------------|
| Bahrami | 2014 | 2016 | Corn silage | Aflatoxin B1 | 2.370 | 0.375 | 4.47 | 0.3   | 8.24 | 40 | 40 | 100 | Asia | Iran | 0.12  | 0.4  | HPLC | Bahrami, R., Shahbazi, Y., & Nikousefat, Z. (2016). Occurrence and seasonal variation of aflatoxin in dairy cow feed with estimation of aflatoxin M-1 in milk from Iran. Food and Agricultural Immunology, 27(3), 388-400. doi:10.1080/09540105.2015.1109616 |
| Bahrami | 2014 | 2016 | Corn silage | Aflatoxin B2 | 2.270 | 0.359 | 3.53 | 0.015 | 7.24 | 40 | 32 | 80  | Asia | Iran | 0.015 | 0.05 | HPLC | Bahrami, R., Shahbazi, Y., & Nikousefat, Z. (2016). Occurrence and seasonal variation of aflatoxin in dairy cow feed with estimation of aflatoxin M-1 in milk from Iran. Food and Agricultural Immunology, 27(3), 388-400. doi:10.1080/09540105.2015.1109617 |
| Bahrami | 2014 | 2016 | Alfalfa hay | Aflatoxin G1 | 0.030 | 0.005 | 0.06 | 0.05  | 0.18 | 40 | 10 | 25  | Asia | Iran | 0.05  | 0.16 | HPLC | Bahrami, R., Shahbazi, Y., & Nikousefat, Z. (2016). Occurrence and seasonal variation of aflatoxin in dairy cow feed with estimation of aflatoxin M-1 in milk from Iran. Food and Agricultural Immunology, 27(3), 388-400. doi:10.1080/09540105.2015.1109618 |
| Bahrami | 2014 | 2016 | Alfalfa hay | Aflatoxin G2 | 0.140 | 0.022 | 0.03 | 0.03  | 0.09 | 40 | 8  | 20  | Asia | Iran | 0.03  | 0.1  | HPLC | Bahrami, R., Shahbazi, Y., & Nikousefat, Z. (2016). Occurrence and seasonal variation of aflatoxin in dairy cow feed with estimation of aflatoxin M-1 in milk from Iran. Food and Agricultural Immunology, 27(3), 388-400. doi:10.1080/09540105.2015.1109619 |
| Bahrami | 2014 | 2016 | Alfalfa hay | Aflatoxin B1 | 0.150 | 0.024 | 0.2  | 0.12  | 0.48 | 40 | 24 | 60  | Asia | Iran | 0.12  | 0.4  | HPLC | Bahrami, R., Shahbazi, Y., & Nikousefat, Z. (2016). Occurrence and seasonal variation of aflatoxin in dairy cow feed with estimation of aflatoxin M-1 in milk from Iran. Food and Agricultural Immunology, 27(3), 388-400. doi:10.1080/09540105.2015.1109620 |
| Bahrami | 2014 | 2016 | Alfalfa hay | Aflatoxin B2 | 0.120 | 0.019 | 0.13 | 0.015 | 0.38 | 40 | 24 | 60  | Asia | Iran | 0.015 | 0.05 | HPLC | Bahrami, R., Shahbazi, Y., & Nikousefat, Z. (2016). Occurrence and seasonal variation of aflatoxin in dairy cow feed with estimation of aflatoxin M-1 in milk from Iran. Food and Agricultural Immunology, 27(3), 388-400. doi:10.1080/09540105.2015.1109621 |
| Bahrami | 2014 | 2016 | Straw       | Aflatoxin G1 | 0.970 | 0.153 | 0.5  | 0.05  | 3.5  | 40 | 12 | 30  | Asia | Iran | 0.05  | 0.16 | HPLC | Bahrami, R., Shahbazi, Y., & Nikousefat, Z. (2016). Occurrence and seasonal variation of aflatoxin in dairy cow feed with estimation of aflatoxin M-1 in milk from Iran. Food and Agricultural Immunology, 27(3), 388-400. doi:10.1080/09540105.2015.1109622 |
| Bahrami | 2014 | 2016 | Straw       | Aflatoxin G2 | 0.480 | 0.076 | 0.26 | 0.03  | 1.75 | 40 | 12 | 30  | Asia | Iran | 0.03  | 0.1  | HPLC | Bahrami, R., Shahbazi, Y., & Nikousefat, Z. (2016). Occurrence and seasonal variation of aflatoxin in dairy cow feed with estimation of aflatoxin M-1 in milk from Iran. Food and Agricultural Immunology, 27(3), 388-400. doi:10.1080/09540105.2015.1109623 |
| Bahrami | 2014 | 2016 | Straw       | Aflatoxin B1 | 1.500 | 0.237 | 1.72 | 0.12  | 5.5  | 40 | 32 | 80  | Asia | Iran | 0.12  | 0.4  | HPLC | Bahrami, R., Shahbazi, Y., & Nikousefat, Z. (2016). Occurrence and seasonal variation of aflatoxin in dairy cow feed with estimation of aflatoxin M-1 in                                                                                                     |

|         |           |      |                  |              |        |        |        |       |        |    |    |    |      |          |       |      |       |                                                                                                                                                                                                                                                              |
|---------|-----------|------|------------------|--------------|--------|--------|--------|-------|--------|----|----|----|------|----------|-------|------|-------|--------------------------------------------------------------------------------------------------------------------------------------------------------------------------------------------------------------------------------------------------------------|
| Bahrami | 2014      | 2016 | Straw            | Aflatoxin B2 | 1.310  | 0.207  | 0.95   | 0.015 | 4.5    | 40 | 26 | 65 | Asia | Iran     | 0.015 | 0.05 | HPLC  | milk from Iran. Food and Agricultural Immunology, 27(3), 388-400. doi:10.1080/09540105.2015.1109624                                                                                                                                                          |
| Chohan  | 2013-2014 | 2016 | Maize            | Aflatoxin B1 | 10.462 | 1.720  | 28.18  | 2.56  | 59.96  | 37 | 12 | 32 | Asia | Pakistan |       |      | ELISA | Bahrami, R., Shahbazi, Y., & Nikousefat, Z. (2016). Occurrence and seasonal variation of aflatoxin in dairy cow feed with estimation of aflatoxin M-1 in milk from Iran. Food and Agricultural Immunology, 27(3), 388-400. doi:10.1080/09540105.2015.1109625 |
| Chohan  | 2013-2014 | 2016 | Beet pulp        | Aflatoxin B1 | 0.280  | 0.140  | 15.89  | 9.52  | 25.01  | 4  | 1  | 25 | Asia | Pakistan |       |      | ELISA | Chohan, K. A., Awan, F., Ali, M. M., Iqbal, U., & Ijaz, M. (2016). Assessment of Aflatoxin in Dairy Concentrate Feeds, Total Mixed Rations, Silage and Various Feed Ingredients in Pakistan. Pakistan Journal of Zoology, 48(1), 277-280.                    |
| Chohan  | 2013-2014 | 2016 | Cotton seed cake | Aflatoxin B1 | 46.800 | 9.360  | 111.94 | 6.92  | 185.97 | 25 | 17 | 68 | Asia | Pakistan |       |      | ELISA | Chohan, K. A., Awan, F., Ali, M. M., Iqbal, U., & Ijaz, M. (2016). Assessment of Aflatoxin in Dairy Concentrate Feeds, Total Mixed Rations, Silage and Various Feed Ingredients in Pakistan. Pakistan Journal of Zoology, 48(1), 277-280.                    |
| Chohan  | 2013-2014 | 2016 | Soya bean meal   | Aflatoxin B1 | 6.409  | 1.850  | 19.2   | 3.56  | 38.45  | 12 | 2  | 16 | Asia | Pakistan |       |      | ELISA | Chohan, K. A., Awan, F., Ali, M. M., Iqbal, U., & Ijaz, M. (2016). Assessment of Aflatoxin in Dairy Concentrate Feeds, Total Mixed Rations, Silage and Various Feed Ingredients in Pakistan. Pakistan Journal of Zoology, 48(1), 277-280.                    |
| Chohan  | 2013-2014 | 2016 | Rice             | Aflatoxin B1 | 6.513  | 1.880  | 16.4   | 1.02  | 30.98  | 12 | 6  | 50 | Asia | Pakistan |       |      | ELISA | Chohan, K. A., Awan, F., Ali, M. M., Iqbal, U., & Ijaz, M. (2016). Assessment of Aflatoxin in Dairy Concentrate Feeds, Total Mixed Rations, Silage and Various Feed Ingredients in Pakistan. Pakistan Journal of Zoology, 48(1), 277-280.                    |
| Chohan  | 2013-2014 | 2016 | Corn gluten meal | Aflatoxin B1 | 55.498 | 17.550 | 116.77 | 17.14 | 210.07 | 10 | 6  | 60 | Asia | Pakistan |       |      | ELISA | Chohan, K. A., Awan, F., Ali, M. M., Iqbal, U., & Ijaz, M. (2016). Assessment of Aflatoxin in Dairy Concentrate Feeds, Total Mixed Rations, Silage and Various Feed Ingredients in Pakistan. Pakistan Journal of Zoology, 48(1), 277-280.                    |
| Chohan  | 2013-2014 | 2016 | Poppy seed meal  | Aflatoxin B1 | 25.640 | 12.820 | 31.68  | 8.23  | 57.51  | 4  | 2  | 50 | Asia | Pakistan |       |      | ELISA | Chohan, K. A., Awan, F., Ali, M. M., Iqbal, U., & Ijaz, M. (2016). Assessment of Aflatoxin in Dairy Concentrate Feeds, Total Mixed Rations, Silage and Various Feed Ingredients in Pakistan. Pakistan Journal of Zoology, 48(1), 277-280.                    |
| Chohan  | 2013-2014 | 2016 | Rice polish      | Aflatoxin B1 | 8.061  | 2.850  | 22.07  | 15.19 | 40.15  | 8  | 4  | 50 | Asia | Pakistan |       |      | ELISA | Chohan, K. A., Awan, F., Ali, M. M., Iqbal, U., & Ijaz, M. (2016). Assessment of Aflatoxin in Dairy Concentrate Feeds, Total Mixed Rations, Silage and Various Feed Ingredients in Pakistan. Pakistan Journal of Zoology, 48(1), 277-280.                    |
| Chohan  | 2013-2014 | 2016 | Sunflower meal   | Aflatoxin B1 | 5.791  | 2.590  | 23.86  | 12.39 | 39.21  | 5  | 2  | 40 | Asia | Pakistan |       |      | ELISA | Chohan, K. A., Awan, F., Ali, M. M., Iqbal, U., & Ijaz, M. (2016). Assessment of Aflatoxin in Dairy                                                                                                                                                          |

|        |           |      |                |                  |       |       |       |      |       |    |    |       |      |          |       |                                                                                                                                                                                                                                                                                                                                                                                    |       |                                                                                                                                                                                                                                                                                           |
|--------|-----------|------|----------------|------------------|-------|-------|-------|------|-------|----|----|-------|------|----------|-------|------------------------------------------------------------------------------------------------------------------------------------------------------------------------------------------------------------------------------------------------------------------------------------------------------------------------------------------------------------------------------------|-------|-------------------------------------------------------------------------------------------------------------------------------------------------------------------------------------------------------------------------------------------------------------------------------------------|
| Chohan | 2013-2014 | 2016 | Canola meal    | Aflatoxin B1     | 3.320 | 1.660 | 7.08  | 3.23 | 21.33 | 4  | 1  | 25    | Asia | Pakistan | ELISA | Concentrate Feeds, Total Mixed Rations, Silage and Various Feed Ingredients in Pakistan. Pakistan Journal of Zoology, 48(1), 277-280.<br>Chohan, K. A., Awan, F., Ali, M. M., Iqbal, U., & Ijaz, M. (2016). Assessment of Aflatoxin in Dairy Concentrate Feeds, Total Mixed Rations, Silage and Various Feed Ingredients in Pakistan. Pakistan Journal of Zoology, 48(1), 277-280. |       |                                                                                                                                                                                                                                                                                           |
|        | 2013-2014 | 2016 | Rape seed meal | Aflatoxin B1     | 7.540 | 3.770 | 8.78  | 1.58 | 28.59 | 4  | 1  | 25    | Asia | Pakistan | ELISA | Chohan, K. A., Awan, F., Ali, M. M., Iqbal, U., & Ijaz, M. (2016). Assessment of Aflatoxin in Dairy Concentrate Feeds, Total Mixed Rations, Silage and Various Feed Ingredients in Pakistan. Pakistan Journal of Zoology, 48(1), 277-280.                                                                                                                                          |       |                                                                                                                                                                                                                                                                                           |
|        | 2013-2014 | 2016 | Vanda          | Aflatoxin B1     | 8.061 | 1.140 | 29.3  | 5.31 | 42.39 | 50 | 32 | 64    | Asia | Pakistan | ELISA | Chohan, K. A., Awan, F., Ali, M. M., Iqbal, U., & Ijaz, M. (2016). Assessment of Aflatoxin in Dairy Concentrate Feeds, Total Mixed Rations, Silage and Various Feed Ingredients in Pakistan. Pakistan Journal of Zoology, 48(1), 277-280.                                                                                                                                          |       |                                                                                                                                                                                                                                                                                           |
|        | 2013-2014 | 2016 | Silage         | Aflatoxin B1     | 3.741 | 0.780 | 9.98  | 2.51 | 21.56 | 23 | 5  | 21.74 | Asia | Pakistan | ELISA | Chohan, K. A., Awan, F., Ali, M. M., Iqbal, U., & Ijaz, M. (2016). Assessment of Aflatoxin in Dairy Concentrate Feeds, Total Mixed Rations, Silage and Various Feed Ingredients in Pakistan. Pakistan Journal of Zoology, 48(1), 277-280.                                                                                                                                          |       |                                                                                                                                                                                                                                                                                           |
|        | 2013-2014 | 2016 | TMR            | Aflatoxin B1     | 5.280 | 1.760 | 21.97 | 3.02 | 55.17 | 9  | 3  | 33.33 | Asia | Pakistan | ELISA | Chohan, K. A., Awan, F., Ali, M. M., Iqbal, U., & Ijaz, M. (2016). Assessment of Aflatoxin in Dairy Concentrate Feeds, Total Mixed Rations, Silage and Various Feed Ingredients in Pakistan. Pakistan Journal of Zoology, 48(1), 277-280.                                                                                                                                          |       |                                                                                                                                                                                                                                                                                           |
|        | 2013-2014 | 2016 | Hay            | Aflatoxin B1     | 4.327 | 1.530 | 4.91  | 0.56 | 22.31 | 8  | 1  | 12.5  | Asia | Pakistan | ELISA | Chohan, K. A., Awan, F., Ali, M. M., Iqbal, U., & Ijaz, M. (2016). Assessment of Aflatoxin in Dairy Concentrate Feeds, Total Mixed Rations, Silage and Various Feed Ingredients in Pakistan. Pakistan Journal of Zoology, 48(1), 277-280.                                                                                                                                          |       |                                                                                                                                                                                                                                                                                           |
| Ehsani | 2014      | 2016 | Concentrate    | Aflatoxin B1     | 0.042 | 0.005 | 9.77  | 2.08 | 19.41 | 70 | 31 | 44.3  | Asia | Iran     | 0.08  | 0.3                                                                                                                                                                                                                                                                                                                                                                                | HPLC  | Ehsani, A., Barani, A., & Nasiri, Z. (2016). Occurrence of aflatoxin B1 contamination in dairy cows feed in Iran. Toxin Reviews, 35(1-2), 54-57. doi:10.3109/15569543.2016.1155622                                                                                                        |
| Ehsani | 2014      | 2016 | Corn silage    | Aflatoxin B1     | 0.033 | 0.004 | 1098  | 2.53 | 18.65 | 70 | 18 | 25.7  | Asia | Iran     | 0.08  | 0.3                                                                                                                                                                                                                                                                                                                                                                                | HPLC  | Ehsani, A., Barani, A., & Nasiri, Z. (2016). Occurrence of aflatoxin B1 contamination in dairy cows feed in Iran. Toxin Reviews, 35(1-2), 54-57. doi:10.3109/15569543.2016.1155623                                                                                                        |
| Ehsani | 2014      | 2016 | Alfalfa hay    | Aflatoxin B1     | 0.033 | 0.004 | 10.24 | 1.87 | 16.29 | 70 | 39 | 55.7  | Asia | Iran     | 0.08  | 0.3                                                                                                                                                                                                                                                                                                                                                                                | HPLC  | Ehsani, A., Barani, A., & Nasiri, Z. (2016). Occurrence of aflatoxin B1 contamination in dairy cows feed in Iran. Toxin Reviews, 35(1-2), 54-57. doi:10.3109/15569543.2016.1155624                                                                                                        |
| Ekici  | 2012      | 2016 | Animal feed    | Total Aflatoxins |       |       |       | 0    | 33.9  | 88 | 72 | 81.81 | Asia | Turkey   | 0.03  | 0.08                                                                                                                                                                                                                                                                                                                                                                               | ELISA | Ekici, H., Yildirim, E., & Yarsan, E. (2016). The effect of seasonal variations on the occurrence of certain mycotoxins in concentrate feeds for cattle collected from some provinces in Turkey. Turkish Journal of Veterinary & Animal Sciences, 40(3), 298-303. doi:10.3906/vet-1501-71 |



|         |      |      |                     |              |        |       |      |      |       |     |    |       |      |        |      |      |       |                                                                                                                                                                                                                                                                                           |
|---------|------|------|---------------------|--------------|--------|-------|------|------|-------|-----|----|-------|------|--------|------|------|-------|-------------------------------------------------------------------------------------------------------------------------------------------------------------------------------------------------------------------------------------------------------------------------------------------|
| Ekici   | 2012 | 2016 | Animal feed         | Aflatoxin B1 |        |       |      | 0    | 19.24 | 88  | 72 | 81.81 | Asia | Turkey | 0.01 | 0.03 | ELISA | Ekici, H., Yildirim, E., & Yarsan, E. (2016). The effect of seasonal variations on the occurrence of certain mycotoxins in concentrate feeds for cattle collected from some provinces in Turkey. Turkish Journal of Veterinary & Animal Sciences, 40(3), 298-303. doi:10.3906/vet-1501-71 |
| Ekici   | 2012 | 2016 | Animal feed         | Ochratoxin A |        |       |      | 0    | 79.1  | 88  | 84 | 95.45 | Asia | Turkey | 0.01 | 0.04 | ELISA | Ekici, H., Yildirim, E., & Yarsan, E. (2016). The effect of seasonal variations on the occurrence of certain mycotoxins in concentrate feeds for cattle collected from some provinces in Turkey. Turkish Journal of Veterinary & Animal Sciences, 40(3), 298-303. doi:10.3906/vet-1501-71 |
| Ekici   | 2012 | 2016 | Animal feed         | Fumonisin s  |        |       |      | 0    | 3900  | 88  | 83 | 94.31 | Asia | Turkey | 2    | 7    | ELISA | Ekici, H., Yildirim, E., & Yarsan, E. (2016). The effect of seasonal variations on the occurrence of certain mycotoxins in concentrate feeds for cattle collected from some provinces in Turkey. Turkish Journal of Veterinary & Animal Sciences, 40(3), 298-303. doi:10.3906/vet-1501-71 |
| Hashemi |      | 2016 | Corn silage         | Aflatoxin B1 | 9.946  | 0.980 | 3.86 | 0    | 71.57 | 103 | 97 | 94.17 | Asia | Iran   | 1    |      | ELISA | Hashemi, M. (2016). Aflatoxin B1 levels in feedstuffs from dairy cow farms in south of Iran. Food and Agricultural Immunology, 27(2), 251-258. doi:10.1080/09540105.2015.1086320                                                                                                          |
| Hashemi |      | 2016 | Full ration pellet  | Aflatoxin B1 | 5.600  | 0.700 | 3.64 | 0.02 | 36.07 | 64  | 64 | 100   | Asia | Iran   | 1    |      | ELISA | Hashemi, M. (2016). Aflatoxin B1 levels in feedstuffs from dairy cow farms in south of Iran. Food and Agricultural Immunology, 27(2), 251-258. doi:10.1080/09540105.2015.1086321                                                                                                          |
| Hashemi |      | 2016 | Alfalfa hay         | Aflatoxin B1 | 14.527 | 2.190 | 6.75 | 0    | 66.57 | 44  | 43 | 97.73 | Asia | Iran   | 1    |      | ELISA | Hashemi, M. (2016). Aflatoxin B1 levels in feedstuffs from dairy cow farms in south of Iran. Food and Agricultural Immunology, 27(2), 251-258. doi:10.1080/09540105.2015.1086322                                                                                                          |
| Hashemi |      | 2016 | Wheat bran          | Aflatoxin B1 | 8.836  | 1.380 | 2.94 | 0    | 56.13 | 41  | 40 | 97.56 | Asia | Iran   | 1    |      | ELISA | Hashemi, M. (2016). Aflatoxin B1 levels in feedstuffs from dairy cow farms in south of Iran. Food and Agricultural Immunology, 27(2), 251-258. doi:10.1080/09540105.2015.1086319                                                                                                          |
| Hashemi |      | 2016 | Recycled bread      | Aflatoxin B1 | 12.671 | 2.240 | 4.32 | 0    | 63.11 | 32  | 28 | 87.5  | Asia | Iran   | 1    |      | ELISA | Hashemi, M. (2016). Aflatoxin B1 levels in feedstuffs from dairy cow farms in south of Iran. Food and Agricultural Immunology, 27(2), 251-258. doi:10.1080/09540105.2015.1086324                                                                                                          |
| Hashemi |      | 2016 | Crushed yellow corn | Aflatoxin B1 | 14.640 | 3.660 | 9.94 | 0    | 45.46 | 16  | 14 | 87.5  | Asia | Iran   | 1    |      | ELISA | Hashemi, M. (2016). Aflatoxin B1 levels in feedstuffs from dairy cow farms in south of Iran. Food and Agricultural Immunology, 27(2), 251-258. doi:10.1080/09540105.2015.1086325                                                                                                          |
| Hashemi |      | 2016 | Barley              | Aflatoxin B1 | 1.235  | 0.330 | 1.31 | 0    | 3.35  | 14  | 13 | 92.81 | Asia | Iran   | 1    |      | ELISA | Hashemi, M. (2016). Aflatoxin B1 levels in feedstuffs from dairy cow farms in south of Iran. Food and Agricultural Immunology, 27(2), 251-258. doi:10.1080/09540105.2015.1086319                                                                                                          |
| Hashemi |      | 2016 | Cotton Seed meal    | Aflatoxin B1 | 1.028  | 0.310 | 2.13 | 0.17 | 3.38  | 11  | 11 | 100   | Asia | Iran   | 1    |      | ELISA | Hashemi, M. (2016). Aflatoxin B1 levels in feedstuffs from dairy cow farms in south of Iran. Food and Agricultural Immunology, 27(2), 251-258. doi:10.1080/09540105.2015.1086319                                                                                                          |

|         |           |      |                            |                  |       |       |      |      |       |     |     |       |      |           |      |       |                                                                                                                                                                                  |                                                                                                                                                                                                                                             |
|---------|-----------|------|----------------------------|------------------|-------|-------|------|------|-------|-----|-----|-------|------|-----------|------|-------|----------------------------------------------------------------------------------------------------------------------------------------------------------------------------------|---------------------------------------------------------------------------------------------------------------------------------------------------------------------------------------------------------------------------------------------|
| Hashemi |           | 2016 | Beet pulp                  | Aflatoxin B1     | 1.535 | 0.580 | 1.52 | 0    | 4.5   | 7   | 6   | 85.71 | Asia | Iran      | 1    | ELISA | Hashemi, M. (2016). Aflatoxin B1 levels in feedstuffs from dairy cow farms in south of Iran. Food and Agricultural Immunology, 27(2), 251-258. doi:10.1080/09540105.2015.1086319 |                                                                                                                                                                                                                                             |
| Hashemi |           | 2016 | Soya bean meal             | Aflatoxin B1     | 4.101 | 1.550 | 6.62 | 0    | 11.46 | 7   | 5   | 71.43 | Asia | Iran      | 1    | ELISA | Hashemi, M. (2016). Aflatoxin B1 levels in feedstuffs from dairy cow farms in south of Iran. Food and Agricultural Immunology, 27(2), 251-258. doi:10.1080/09540105.2015.1086319 |                                                                                                                                                                                                                                             |
| Hashemi |           | 2016 | Wheat flour                | Aflatoxin B1     | 0.580 | 0.290 | 1.17 | 0.36 | 1.71  | 4   | 4   | 100   | Asia | Iran      | 1    | ELISA | Hashemi, M. (2016). Aflatoxin B1 levels in feedstuffs from dairy cow farms in south of Iran. Food and Agricultural Immunology, 27(2), 251-258. doi:10.1080/09540105.2015.1086320 |                                                                                                                                                                                                                                             |
| Hashemi |           | 2016 | Meat powder                | Aflatoxin B1     | 1.480 | 0.740 | 2.28 | 0.91 | 3.6   | 4   | 4   | 100   | Asia | Iran      | 1    | ELISA | Hashemi, M. (2016). Aflatoxin B1 levels in feedstuffs from dairy cow farms in south of Iran. Food and Agricultural Immunology, 27(2), 251-258. doi:10.1080/09540105.2015.1086321 |                                                                                                                                                                                                                                             |
| Hashemi |           | 2016 | Dairy cattle (Animal feed) | Aflatoxin B1     | 9.873 | 0.530 | 4.12 | 0    | 71.57 | 347 | 329 | 94.81 | Asia | Iran      | 1    | ELISA | Hashemi, M. (2016). Aflatoxin B1 levels in feedstuffs from dairy cow farms in south of Iran. Food and Agricultural Immunology, 27(2), 251-258. doi:10.1080/09540105.2015.1086319 |                                                                                                                                                                                                                                             |
| Iqbal   | 2012-2013 | 2016 | Cotton Seed meal           | Aflatoxin B1     | 0.450 | 0.106 | 4.5  | 0.09 | 85.5  | 18  | 12  | 67    | Asia | Pakist an | 0.03 | 0.09  | HPLC                                                                                                                                                                             | Iqbal, S. Z., Asi, M. R., Nisar, S., Zia, K. M., Jinap, S., & Malik, N. (2016). A Limited Survey of Aflatoxins and Zearalenone in Feed and Feed Ingredients from Pakistan. J Food Prot, 79(10), 1798-1801. doi:10.4315/0362-028x.jfp-16-091 |
|         | 2012-2013 | 2016 | Cotton Seed meal           | Total Aflatoxins | 1.200 | 0.283 | 6.45 |      | 91.5  | 18  | 12  | 67    | Asia | Pakist an |      |       | HPLC                                                                                                                                                                             | Iqbal, S. Z., Asi, M. R., Nisar, S., Zia, K. M., Jinap, S., & Malik, N. (2016). A Limited Survey of Aflatoxins and Zearalenone in Feed and Feed Ingredients from Pakistan. J Food Prot, 79(10), 1798-1801. doi:10.4315/0362-028x.jfp-16-091 |
|         | 2012-2013 | 2016 | Soya bean meal             | Aflatoxin B1     | 0.750 | 0.200 | 4.9  | 0.09 | 105.9 | 14  | 9   | 64    | Asia | Pakist an | 0.03 | 0.09  | HPLC                                                                                                                                                                             | Iqbal, S. Z., Asi, M. R., Nisar, S., Zia, K. M., Jinap, S., & Malik, N. (2016). A Limited Survey of Aflatoxins and Zearalenone in Feed and Feed Ingredients from Pakistan. J Food Prot, 79(10), 1798-1801. doi:10.4315/0362-028x.jfp-16-091 |
|         | 2012-2013 | 2016 | Soya bean meal             | Total Aflatoxins | 0.700 | 0.187 | 5.2  |      | 135.3 | 14  | 9   | 64    | Asia | Pakist an |      |       | HPLC                                                                                                                                                                             | Iqbal, S. Z., Asi, M. R., Nisar, S., Zia, K. M., Jinap, S., & Malik, N. (2016). A Limited Survey of Aflatoxins and Zearalenone in Feed and Feed Ingredients from Pakistan. J Food Prot, 79(10), 1798-1801. doi:10.4315/0362-028x.jfp-16-091 |
|         | 2012-2013 | 2016 | Barley                     | Aflatoxin B1     | 1.100 | 0.267 | 2.98 | 0.09 | 45.2  | 17  | 12  | 70    | Asia | Pakist an | 0.03 | 0.09  | HPLC                                                                                                                                                                             | Iqbal, S. Z., Asi, M. R., Nisar, S., Zia, K. M., Jinap, S., & Malik, N. (2016). A Limited Survey of Aflatoxins and Zearalenone in Feed and Feed Ingredients from Pakistan. J Food Prot, 79(10), 1798-1801. doi:10.4315/0362-028x.jfp-16-091 |
|         | 2012-2013 | 2016 | Barley                     | Total Aflatoxins | 0.300 | 0.073 | 4.5  |      | 50.5  | 17  | 12  | 70    | Asia | Pakist an |      |       | HPLC                                                                                                                                                                             | Iqbal, S. Z., Asi, M. R., Nisar, S., Zia, K. M., Jinap, S., & Malik, N. (2016). A Limited Survey of Aflatoxins and Zearalenone in Feed and Feed Ingredients from Pakistan. J Food Prot, 79(10), 1798-1801. doi:10.4315/0362-028x.jfp-16-091 |

|       |           |      |                  |                  |       |       |       |      |        |    |    |    |      |          |      |      |      |                                                                                                                                                                                                                                             |
|-------|-----------|------|------------------|------------------|-------|-------|-------|------|--------|----|----|----|------|----------|------|------|------|---------------------------------------------------------------------------------------------------------------------------------------------------------------------------------------------------------------------------------------------|
| Iqbal | 2012-2013 | 2016 | Cotton Seed meal | Zearalenone      | 0.900 | 0.212 | 14.12 | 0.15 | 85.54  | 18 | 13 | 67 | Asia | Pakistan | 0.05 | 0.15 | HPLC | Iqbal, S. Z., Asi, M. R., Nisar, S., Zia, K. M., Jinap, S., & Malik, N. (2016). A Limited Survey of Aflatoxins and Zearalenone in Feed and Feed Ingredients from Pakistan. J Food Prot, 79(10), 1798-1801. doi:10.4315/0362-028x.jfp-16-091 |
| Iqbal | 2012-2013 | 2016 | Soya bean meal   | Zearalenone      | 1.780 | 0.476 | 18.9  | 0.15 | 120.89 | 14 | 10 | 71 | Asia | Pakistan | 0.05 | 0.15 | HPLC | Iqbal, S. Z., Asi, M. R., Nisar, S., Zia, K. M., Jinap, S., & Malik, N. (2016). A Limited Survey of Aflatoxins and Zearalenone in Feed and Feed Ingredients from Pakistan. J Food Prot, 79(10), 1798-1801. doi:10.4315/0362-028x.jfp-16-091 |
| Iqbal | 2012-2013 | 2016 | Barley           | Zearalenone      | 0.980 | 0.238 | 8.74  | 0.15 | 91.6   | 17 | 9  | 53 | Asia | Pakistan | 0.05 | 0.15 | HPLC | Iqbal, S. Z., Asi, M. R., Nisar, S., Zia, K. M., Jinap, S., & Malik, N. (2016). A Limited Survey of Aflatoxins and Zearalenone in Feed and Feed Ingredients from Pakistan. J Food Prot, 79(10), 1798-1801. doi:10.4315/0362-028x.jfp-16-091 |
| Iqbal | 2012-2013 | 2016 | Crushed corn     | Aflatoxin B1     | 0.980 | 0.238 | 5.2   | 0.09 | 69.7   | 17 | 12 | 71 | Asia | Pakistan | 0.03 | 0.09 | HPLC | Iqbal, S. Z., Asi, M. R., Nisar, S., Zia, K. M., Jinap, S., & Malik, N. (2016). A Limited Survey of Aflatoxins and Zearalenone in Feed and Feed Ingredients from Pakistan. J Food Prot, 79(10), 1798-1801. doi:10.4315/0362-028x.jfp-16-092 |
| Iqbal | 2012-2013 | 2016 | Crushed wheat    | Aflatoxin B1     | 0.430 | 0.111 | 4.25  | 0.09 | 55.2   | 15 | 8  | 53 | Asia | Pakistan | 0.03 | 0.09 | HPLC | Iqbal, S. Z., Asi, M. R., Nisar, S., Zia, K. M., Jinap, S., & Malik, N. (2016). A Limited Survey of Aflatoxins and Zearalenone in Feed and Feed Ingredients from Pakistan. J Food Prot, 79(10), 1798-1801. doi:10.4315/0362-028x.jfp-16-093 |
| Iqbal | 2012-2013 | 2016 | Poultry feed 1   | Aflatoxin B1     | 1.400 | 0.422 | 6.2   | 0.09 | 145.7  | 11 | 9  | 82 | Asia | Pakistan | 0.03 | 0.09 | HPLC | Iqbal, S. Z., Asi, M. R., Nisar, S., Zia, K. M., Jinap, S., & Malik, N. (2016). A Limited Survey of Aflatoxins and Zearalenone in Feed and Feed Ingredients from Pakistan. J Food Prot, 79(10), 1798-1801. doi:10.4315/0362-028x.jfp-16-094 |
| Iqbal | 2012-2013 | 2016 | Poultry feed 2   | Aflatoxin B1     | 0.870 | 0.241 | 4.97  | 0.09 | 98.3   | 13 | 7  | 54 | Asia | Pakistan | 0.03 | 0.09 | HPLC | Iqbal, S. Z., Asi, M. R., Nisar, S., Zia, K. M., Jinap, S., & Malik, N. (2016). A Limited Survey of Aflatoxins and Zearalenone in Feed and Feed Ingredients from Pakistan. J Food Prot, 79(10), 1798-1801. doi:10.4315/0362-028x.jfp-16-095 |
| Iqbal | 2012-2013 | 2016 | Crushed corn     | Total Aflatoxins | 0.980 | 0.238 | 7.8   |      | 85.4   | 17 | 12 | 71 | Asia | Pakistan |      |      | HPLC | Iqbal, S. Z., Asi, M. R., Nisar, S., Zia, K. M., Jinap, S., & Malik, N. (2016). A Limited Survey of Aflatoxins and Zearalenone in Feed and Feed Ingredients from Pakistan. J Food Prot, 79(10), 1798-1801. doi:10.4315/0362-028x.jfp-16-092 |
| Iqbal | 2012-2013 | 2016 | Crushed wheat    | Total Aflatoxins | 0.830 | 0.214 | 6.73  |      | 55.2   | 15 | 8  | 53 | Asia | Pakistan |      |      | HPLC | Iqbal, S. Z., Asi, M. R., Nisar, S., Zia, K. M., Jinap, S., & Malik, N. (2016). A Limited Survey of Aflatoxins and Zearalenone in Feed and Feed Ingredients from Pakistan. J Food Prot, 79(10), 1798-1801. doi:10.4315/0362-028x.jfp-16-093 |
| Iqbal | 2012-2013 | 2016 | Poultry feed 1   | Total Aflatoxins | 1.400 | 0.422 | 9.3   |      | 165.5  | 11 | 9  | 82 | Asia | Pakistan |      |      | HPLC | Iqbal, S. Z., Asi, M. R., Nisar, S., Zia, K. M., Jinap, S., & Malik, N. (2016). A Limited Survey of Aflatoxins and Zearalenone in Feed and Feed Ingredients from Pakistan. J Food Prot, 79(10), 1798-1801. doi:10.4315/0362-028x.jfp-16-094 |

|       |           |      |                            |                  |       |       |       |       |        |    |    |      |      |          |       |       |      |                                                                                                                                                                                                                                             |
|-------|-----------|------|----------------------------|------------------|-------|-------|-------|-------|--------|----|----|------|------|----------|-------|-------|------|---------------------------------------------------------------------------------------------------------------------------------------------------------------------------------------------------------------------------------------------|
| Iqbal | 2012-2013 | 2016 | Poultry feed 2             | Total Aflatoxins | 1.100 | 0.305 | 7.89  |       | 103.1  | 13 | 7  | 54   | Asia | Pakistan |       |       | HPLC | Iqbal, S. Z., Asi, M. R., Nisar, S., Zia, K. M., Jinap, S., & Malik, N. (2016). A Limited Survey of Aflatoxins and Zearalenone in Feed and Feed Ingredients from Pakistan. J Food Prot, 79(10), 1798-1801. doi:10.4315/0362-028x.jfp-16-095 |
| Iqbal | 2012-2013 | 2016 | Crushed corn               | Zearalenone      | 0.290 | 0.070 | 9.87  | 0.15  | 69.9   | 17 | 14 | 82   | Asia | Pakistan | 0.05  | 0.15  | HPLC | Iqbal, S. Z., Asi, M. R., Nisar, S., Zia, K. M., Jinap, S., & Malik, N. (2016). A Limited Survey of Aflatoxins and Zearalenone in Feed and Feed Ingredients from Pakistan. J Food Prot, 79(10), 1798-1801. doi:10.4315/0362-028x.jfp-16-092 |
| Iqbal | 2012-2013 | 2016 | Crushed wheat              | Zearalenone      | 1.600 | 0.413 | 18.64 | 0.15  | 145.3  | 15 | 10 | 67   | Asia | Pakistan | 0.05  | 0.15  | HPLC | Iqbal, S. Z., Asi, M. R., Nisar, S., Zia, K. M., Jinap, S., & Malik, N. (2016). A Limited Survey of Aflatoxins and Zearalenone in Feed and Feed Ingredients from Pakistan. J Food Prot, 79(10), 1798-1801. doi:10.4315/0362-028x.jfp-16-093 |
| Iqbal | 2012-2013 | 2016 | Poultry feed 1             | Zearalenone      | 0.700 | 0.211 | 15.8  | 0.15  | 125.2  | 11 | 9  | 82   | Asia | Pakistan | 0.05  | 0.15  | HPLC | Iqbal, S. Z., Asi, M. R., Nisar, S., Zia, K. M., Jinap, S., & Malik, N. (2016). A Limited Survey of Aflatoxins and Zearalenone in Feed and Feed Ingredients from Pakistan. J Food Prot, 79(10), 1798-1801. doi:10.4315/0362-028x.jfp-16-094 |
| Iqbal | 2012-2013 | 2016 | Poultry feed 2             | Zearalenone      | 0.880 | 0.244 | 19.45 | 0.15  | 118.42 | 13 | 10 | 77   | Asia | Pakistan | 0.05  | 0.15  | HPLC | Iqbal, S. Z., Asi, M. R., Nisar, S., Zia, K. M., Jinap, S., & Malik, N. (2016). A Limited Survey of Aflatoxins and Zearalenone in Feed and Feed Ingredients from Pakistan. J Food Prot, 79(10), 1798-1801. doi:10.4315/0362-028x.jfp-16-095 |
| Sahin | 2012-2015 | 2016 | Dairy cattle (Animal feed) | Aflatoxin B1     | 0.120 | 0.014 | 2.25  | 0.278 | 6.89   | 76 | 21 | 26.3 | Asia | Turkey   | 0.054 | 0.181 | HPLC | Sahin, H. Z., Celik, M., Kotay, S., & Kabak, B. (2016). Aflatoxins in dairy cow feed, raw milk and milk products from Turkey. Food Addit Contam Part B Surveill, 9(2), 152-158. doi:10.1080/19393210.2016.1152599                           |
| Sahin | 2012-2015 | 2016 | Dairy cattle (Animal feed) | Aflatoxin B2     | 0.099 | 0.011 | 0.231 | 0.081 | 0.752  | 76 | 18 | 23.7 | Asia | Turkey   | 0.046 | 0.153 | HPLC | Sahin, H. Z., Celik, M., Kotay, S., & Kabak, B. (2016). Aflatoxins in dairy cow feed, raw milk and milk products from Turkey. Food Addit Contam Part B Surveill, 9(2), 152-158. doi:10.1080/19393210.2016.1152599                           |
| Sahin | 2012-2015 | 2016 | Dairy cattle (Animal feed) | Aflatoxin G1     | 0.021 | 0.002 | 0.334 | 0.207 | 0.788  | 76 | 17 | 22.4 | Asia | Turkey   | 0.059 | 0.197 | HPLC | Sahin, H. Z., Celik, M., Kotay, S., & Kabak, B. (2016). Aflatoxins in dairy cow feed, raw milk and milk products from Turkey. Food Addit Contam Part B Surveill, 9(2), 152-158. doi:10.1080/19393210.2016.1152599                           |
| Sahin | 2012-2015 | 2016 | Dairy cattle (Animal feed) | Aflatoxin G2     |       |       |       |       |        | 76 | 0  | 0    | Asia | Turkey   | 0.05  | 0.168 | HPLC | Sahin, H. Z., Celik, M., Kotay, S., & Kabak, B. (2016). Aflatoxins in dairy cow feed, raw milk and milk products from Turkey. Food Addit Contam Part B Surveill, 9(2), 152-158. doi:10.1080/19393210.2016.1152600                           |
| Sahin | 2012-2015 | 2016 | Dairy cattle (Animal feed) | Total Aflatoxins |       |       | 2.74  | 0.278 | 8.43   | 76 | 20 | 26.3 | Asia | Turkey   |       |       | HPLC | Sahin, H. Z., Celik, M., Kotay, S., & Kabak, B. (2016). Aflatoxins in dairy cow feed, raw milk and milk products from Turkey. Food Addit Contam Part B Surveill, 9(2), 152-158. doi:10.1080/19393210.2016.1152599                           |



|          |           |      |                       |                   |       |       |      |  |      |    |    |      |        |         |      |      |          |                                                                                                                                                                                                                                                                                                                                                                                                                          |
|----------|-----------|------|-----------------------|-------------------|-------|-------|------|--|------|----|----|------|--------|---------|------|------|----------|--------------------------------------------------------------------------------------------------------------------------------------------------------------------------------------------------------------------------------------------------------------------------------------------------------------------------------------------------------------------------------------------------------------------------|
| Sifou    | 2013-2014 | 2016 | Poultry (Animal Feed) | Ochratoxin A      | 2.400 | 0.305 | 7.1  |  | 26.8 | 62 | 19 | 30.6 | Asia   | Morocco |      | 0.15 | HPLC     | Sifou, A., Mahnine, N., Manyes, L., Adlouni, C. E., Azzouzi, M. E., & Zinedine, A. (2016). Determination of Ochratoxin A in poultry feeds available in Rabat area (Morocco) by High Performance Liquid Chromatography. Journal of Materials and Environmental Science, 7(6), 2229-2234. Retrieved from https://www.scopus.com/inward/record.uri?eid=2-s2.0-84976494160&partnerID=40&md5=83c40aeaa17544064a053983f2dab6fa |
| Abdallah | 2014-2015 | 2017 | Animal feed           | Aflatoxin B1      |       |       | 5.3  |  | 0.72 | 77 | 3  | 4    | Africa | Egypt   | 0.72 | 2.4  | LC-MS/MS | Abdallah, M. F., Girgin, G., Baydar, T., Krska, R., & Sulyok, M. (2017). Occurrence of multiple mycotoxins and other fungal metabolites in animal feed and maize samples from Egypt using LC-MS/MS. J Sci Food Agric, 97(13), 4419-4428. doi:10.1002/jsfa.8293                                                                                                                                                           |
| Abdallah | 2014-2015 | 2017 | Animal feed           | Alpha Zearalenone |       |       | 7.3  |  | 8    | 77 | 5  | 6    | Africa | Egypt   | 1.3  | 4.5  | LC-MS/MS | Abdallah, M. F., Girgin, G., Baydar, T., Krska, R., & Sulyok, M. (2017). Occurrence of multiple mycotoxins and other fungal metabolites in animal feed and maize samples from Egypt using LC-MS/MS. J Sci Food Agric, 97(13), 4419-4428. doi:10.1002/jsfa.8293                                                                                                                                                           |
| Abdallah | 2014-2015 | 2017 | Animal feed           | Beta Zearalenone  |       |       | 3.9  |  | 60   | 77 | 28 | 36   | Africa | Egypt   | 1.2  | 3.5  | LC-MS/MS | Abdallah, M. F., Girgin, G., Baydar, T., Krska, R., & Sulyok, M. (2017). Occurrence of multiple mycotoxins and other fungal metabolites in animal feed and maize samples from Egypt using LC-MS/MS. J Sci Food Agric, 97(13), 4419-4428. doi:10.1002/jsfa.8293                                                                                                                                                           |
| Abdallah | 2014-2015 | 2017 | Animal feed           | Deoxynivalenol    |       |       | 171  |  | 1516 | 77 | 55 | 71   | Africa | Egypt   | 9.5  | 31   | LC-MS/MS | Abdallah, M. F., Girgin, G., Baydar, T., Krska, R., & Sulyok, M. (2017). Occurrence of multiple mycotoxins and other fungal metabolites in animal feed and maize samples from Egypt using LC-MS/MS. J Sci Food Agric, 97(13), 4419-4428. doi:10.1002/jsfa.8293                                                                                                                                                           |
| Abdallah | 2014-2015 | 2017 | Animal feed           | Fumonisin B1      |       |       | 459  |  | 2409 | 77 | 59 | 77   | Africa | Egypt   | 2.6  | 8.5  | LC-MS/MS | Abdallah, M. F., Girgin, G., Baydar, T., Krska, R., & Sulyok, M. (2017). Occurrence of multiple mycotoxins and other fungal metabolites in animal feed and maize samples from Egypt using LC-MS/MS. J Sci Food Agric, 97(13), 4419-4428. doi:10.1002/jsfa.8293                                                                                                                                                           |
| Abdallah | 2014-2015 | 2017 | Animal feed           | Fumonisin B2      |       |       | 55.4 |  | 260  | 77 | 53 | 69   | Africa | Egypt   | 1    | 3.3  | LC-MS/MS | Abdallah, M. F., Girgin, G., Baydar, T., Krska, R., & Sulyok, M. (2017). Occurrence of multiple mycotoxins and other fungal metabolites in animal feed and maize samples from Egypt using LC-MS/MS. J Sci Food Agric, 97(13), 4419-4428. doi:10.1002/jsfa.8293                                                                                                                                                           |
| Abdallah | 2014-2015 | 2017 | Animal feed           | Fumonisin B3      |       |       | 106  |  | 310  | 77 | 42 | 55   | Africa | Egypt   | 3.8  | 11   | LC-MS/MS | Abdallah, M. F., Girgin, G., Baydar, T., Krska, R., & Sulyok, M. (2017). Occurrence of multiple mycotoxins and other fungal metabolites in animal feed and maize samples from Egypt using LC-                                                                                                                                                                                                                            |



|          |           |      |             |                |      |       |    |    |    |        |       |      |      |          |                                                                                                                                                                                                                                                                                                                                     |
|----------|-----------|------|-------------|----------------|------|-------|----|----|----|--------|-------|------|------|----------|-------------------------------------------------------------------------------------------------------------------------------------------------------------------------------------------------------------------------------------------------------------------------------------------------------------------------------------|
| Abdallah | 2014-2015 | 2017 | Animal feed | HT-2 toxin     |      | 32.3  | 77 | 10 | 13 | Africa | Egypt | 1.7  | 5.7  | LC-MS/MS | MS/MS. J Sci Food Agric, 97(13), 4419-4428. doi:10.1002/jsfa.8293<br>Abdallah, M. F., Girgin, G., Baydar, T., Krska, R., & Sulyok, M. (2017). Occurrence of multiple mycotoxins and other fungal metabolites in animal feed and maize samples from Egypt using LC-MS/MS. J Sci Food Agric, 97(13), 4419-4428. doi:10.1002/jsfa.8293 |
| Abdallah | 2014-2015 | 2017 | Animal feed | T-2 toxin      | 5.8  | 39.5  | 77 | 19 | 25 | Africa | Egypt | 1.05 | 3.5  | LC-MS/MS | Abdallah, M. F., Girgin, G., Baydar, T., Krska, R., & Sulyok, M. (2017). Occurrence of multiple mycotoxins and other fungal metabolites in animal feed and maize samples from Egypt using LC-MS/MS. J Sci Food Agric, 97(13), 4419-4428. doi:10.1002/jsfa.8293                                                                      |
| Abdallah | 2014-2015 | 2017 | Animal feed | Zearalenone    | 33.2 | 791   | 77 | 71 | 92 | Africa | Egypt | 0.64 | 2.1  | LC-MS/MS | Abdallah, M. F., Girgin, G., Baydar, T., Krska, R., & Sulyok, M. (2017). Occurrence of multiple mycotoxins and other fungal metabolites in animal feed and maize samples from Egypt using LC-MS/MS. J Sci Food Agric, 97(13), 4419-4428. doi:10.1002/jsfa.8293                                                                      |
| Abdallah | 2014-2015 | 2017 | Maize       | Aflatoxin B1   | 4.81 | 197.5 | 79 | 13 | 16 | Africa | Egypt | 0.3  | 0.98 | LC-MS/MS | Abdallah, M. F., Girgin, G., Baydar, T., Krska, R., & Sulyok, M. (2017). Occurrence of multiple mycotoxins and other fungal metabolites in animal feed and maize samples from Egypt using LC-MS/MS. J Sci Food Agric, 97(13), 4419-4428. doi:10.1002/jsfa.8293                                                                      |
| Abdallah | 2014-2015 | 2017 | Maize       | Aflatoxin B2   | 7.65 | 9.8   | 79 | 4  | 5  | Africa | Egypt | 0.42 | 1.4  | LC-MS/MS | Abdallah, M. F., Girgin, G., Baydar, T., Krska, R., & Sulyok, M. (2017). Occurrence of multiple mycotoxins and other fungal metabolites in animal feed and maize samples from Egypt using LC-MS/MS. J Sci Food Agric, 97(13), 4419-4428. doi:10.1002/jsfa.8293                                                                      |
| Abdallah | 2014-2015 | 2017 | Maize       | Aflatoxin M1   | 1.2  | 2.7   | 79 | 4  | 5  | Africa | Egypt | 0.1  | 0.32 | LC-MS/MS | Abdallah, M. F., Girgin, G., Baydar, T., Krska, R., & Sulyok, M. (2017). Occurrence of multiple mycotoxins and other fungal metabolites in animal feed and maize samples from Egypt using LC-MS/MS. J Sci Food Agric, 97(13), 4419-4428. doi:10.1002/jsfa.8293                                                                      |
| Abdallah | 2014-2015 | 2017 | Maize       | Deoxynivalenol | 311  | 807   | 79 | 6  | 8  | Africa | Egypt | 26   | 86   | LC-MS/MS | Abdallah, M. F., Girgin, G., Baydar, T., Krska, R., & Sulyok, M. (2017). Occurrence of multiple mycotoxins and other fungal metabolites in animal feed and maize samples from Egypt using LC-MS/MS. J Sci Food Agric, 97(13), 4419-4428. doi:10.1002/jsfa.8293                                                                      |
| Abdallah | 2014-2015 | 2017 | Maize       | Fumonisin B1   | 68   | 2453  | 79 | 40 | 51 | Africa | Egypt | 1    | 3.3  | LC-MS/MS | Abdallah, M. F., Girgin, G., Baydar, T., Krska, R., & Sulyok, M. (2017). Occurrence of multiple mycotoxins and other fungal metabolites in animal feed and maize samples from Egypt using LC-MS/MS. J Sci Food Agric, 97(13), 4419-4428. doi:10.1002/jsfa.8293                                                                      |

|          |           |      |                                        |                  |       |       |      |     |      |     |    |     |        |              |      |     |          |                                                                                                                                                                                                                                                                                                |
|----------|-----------|------|----------------------------------------|------------------|-------|-------|------|-----|------|-----|----|-----|--------|--------------|------|-----|----------|------------------------------------------------------------------------------------------------------------------------------------------------------------------------------------------------------------------------------------------------------------------------------------------------|
| Abdallah | 2014-2015 | 2017 | Maize                                  | Fumonisin B2     |       |       | 4.7  |     | 386  | 79  | 14 | 18  | Africa | Egypt        | 1.3  | 4.3 | LC-MS/MS | Abdallah, M. F., Girgin, G., Baydar, T., Krska, R., & Sulyok, M. (2017). Occurrence of multiple mycotoxins and other fungal metabolites in animal feed and maize samples from Egypt using LC-MS/MS. J Sci Food Agric, 97(13), 4419-4428. doi:10.1002/jsfa.8293                                 |
| Abdallah | 2014-2015 | 2017 | Maize                                  | Fumonisin B3     |       |       | 16.8 |     | 286  | 79  | 6  | 8   | Africa | Egypt        | 1.5  | 4.9 | LC-MS/MS | Abdallah, M. F., Girgin, G., Baydar, T., Krska, R., & Sulyok, M. (2017). Occurrence of multiple mycotoxins and other fungal metabolites in animal feed and maize samples from Egypt using LC-MS/MS. J Sci Food Agric, 97(13), 4419-4428. doi:10.1002/jsfa.8293                                 |
| Abdallah | 2014-2015 | 2017 | Maize                                  | Ochratoxin A     |       |       |      |     | 11   | 79  | 2  | 3   | Africa | Egypt        | 2.8  | 9.4 | LC-MS/MS | Abdallah, M. F., Girgin, G., Baydar, T., Krska, R., & Sulyok, M. (2017). Occurrence of multiple mycotoxins and other fungal metabolites in animal feed and maize samples from Egypt using LC-MS/MS. J Sci Food Agric, 97(13), 4419-4428. doi:10.1002/jsfa.8293                                 |
| Abdallah | 2014-2015 | 2017 | Maize                                  | Zearalenone      |       |       | 3.4  |     | 184  | 79  | 10 | 13  | Africa | Egypt        | 0.46 | 1.5 | LC-MS/MS | Abdallah, M. F., Girgin, G., Baydar, T., Krska, R., & Sulyok, M. (2017). Occurrence of multiple mycotoxins and other fungal metabolites in animal feed and maize samples from Egypt using LC-MS/MS. J Sci Food Agric, 97(13), 4419-4428. doi:10.1002/jsfa.8293                                 |
| Abudabos |           | 2017 | Distiller's dried grains with solubles | Aflatoxin B1     | 2.180 | 0.178 | 5.8  | 1   | 9.9  | 150 | 21 | 14  | Asia   | Saudi Arabia |      |     | HPLC     | Abudabos, A. M., Al-Atiyat, R. M., & Khan, R. U. (2017). A survey of mycotoxin contamination and chemical composition of distiller's dried grains with solubles (DDGS) imported from the USA into Saudi Arabia. Environ Sci Pollut Res Int, 24(18), 15401-15405. doi:10.1007/s11356-017-9130-2 |
| Abudabos |           | 2017 | Distiller's dried grains with solubles | Aflatoxin B2     | 0.090 | 0.007 | 0.5  | 0.3 | 0.6  | 150 | 9  | 6   | Asia   | Saudi Arabia |      |     | HPLC     | Abudabos, A. M., Al-Atiyat, R. M., & Khan, R. U. (2017). A survey of mycotoxin contamination and chemical composition of distiller's dried grains with solubles (DDGS) imported from the USA into Saudi Arabia. Environ Sci Pollut Res Int, 24(18), 15401-15405. doi:10.1007/s11356-017-9130-2 |
| Abudabos |           | 2017 | Distiller's dried grains with solubles | Aflatoxin G1     | 0.150 | 0.012 | 0.5  | 0.4 | 0.7  | 150 | 4  | 2.7 | Asia   | Saudi Arabia |      |     | HPLC     | Abudabos, A. M., Al-Atiyat, R. M., & Khan, R. U. (2017). A survey of mycotoxin contamination and chemical composition of distiller's dried grains with solubles (DDGS) imported from the USA into Saudi Arabia. Environ Sci Pollut Res Int, 24(18), 15401-15405. doi:10.1007/s11356-017-9130-2 |
| Abudabos |           | 2017 | Distiller's dried grains with solubles | Aflatoxin G2     | 0.260 | 0.021 | 0.8  | 0.5 | 1.1  | 150 | 6  | 4   | Asia   | Saudi Arabia |      |     | HPLC     | Abudabos, A. M., Al-Atiyat, R. M., & Khan, R. U. (2017). A survey of mycotoxin contamination and chemical composition of distiller's dried grains with solubles (DDGS) imported from the USA into Saudi Arabia. Environ Sci Pollut Res Int, 24(18), 15401-15405. doi:10.1007/s11356-017-9130-2 |
| Abudabos |           | 2017 | Distiller's dried grains               | Total Aflatoxins | 2.600 | 0.212 | 6.3  | 1   | 11.3 | 150 | 21 | 14  | Asia   | Saudi Arabia |      |     | HPLC     | Abudabos, A. M., Al-Atiyat, R. M., & Khan, R. U. (2017). A survey of mycotoxin contamination and chemical composition of distiller's dried grains with                                                                                                                                         |

|          |               |      |                                                 |                    |             |       |       |      |      |     |    |      |      |                     |       |                                                                                                                                                                                                                                                                                                |
|----------|---------------|------|-------------------------------------------------|--------------------|-------------|-------|-------|------|------|-----|----|------|------|---------------------|-------|------------------------------------------------------------------------------------------------------------------------------------------------------------------------------------------------------------------------------------------------------------------------------------------------|
| Abudabos |               |      | with<br>solubles                                |                    |             |       |       |      |      |     |    |      |      |                     |       | solubles (DDGS) imported from the USA into Saudi Arabia. Environ Sci Pollut Res Int, 24(18), 15401-15405. doi:10.1007/s11356-017-9130-2                                                                                                                                                        |
|          | 2017          |      | Distiller's<br>dried grains<br>with<br>solubles | Deoxynival<br>enol | 2.240       | 0.183 | 3000  | 800  | 8100 | 150 | 43 | 28.7 | Asia | Saudi<br>Arabi<br>a | HPLC  | Abudabos, A. M., Al-Atiyat, R. M., & Khan, R. U. (2017). A survey of mycotoxin contamination and chemical composition of distiller's dried grains with solubles (DDGS) imported from the USA into Saudi Arabia. Environ Sci Pollut Res Int, 24(18), 15401-15405. doi:10.1007/s11356-017-9130-2 |
|          | 2017          |      | Distiller's<br>dried grains<br>with<br>solubles | Fumonisin<br>B1    | 0.780       | 0.064 | 1640  | 430  | 3640 | 150 | 38 | 25.3 | Asia | Saudi<br>Arabi<br>a | HPLC  | Abudabos, A. M., Al-Atiyat, R. M., & Khan, R. U. (2017). A survey of mycotoxin contamination and chemical composition of distiller's dried grains with solubles (DDGS) imported from the USA into Saudi Arabia. Environ Sci Pollut Res Int, 24(18), 15401-15405. doi:10.1007/s11356-017-9130-2 |
|          | 2017          |      | Distiller's<br>dried grains<br>with<br>solubles | Fumonisin<br>B2    | 0.500       | 0.041 | 590   | 210  | 2100 | 150 | 35 | 23.3 | Asia | Saudi<br>Arabi<br>a | HPLC  | Abudabos, A. M., Al-Atiyat, R. M., & Khan, R. U. (2017). A survey of mycotoxin contamination and chemical composition of distiller's dried grains with solubles (DDGS) imported from the USA into Saudi Arabia. Environ Sci Pollut Res Int, 24(18), 15401-15405. doi:10.1007/s11356-017-9130-2 |
|          | 2017          |      | Distiller's<br>dried grains<br>with<br>solubles | Fumonisin<br>B3    | 0.160       | 0.013 | 360   | 210  | 650  | 150 | 9  | 6    | Asia | Saudi<br>Arabi<br>a | HPLC  | Abudabos, A. M., Al-Atiyat, R. M., & Khan, R. U. (2017). A survey of mycotoxin contamination and chemical composition of distiller's dried grains with solubles (DDGS) imported from the USA into Saudi Arabia. Environ Sci Pollut Res Int, 24(18), 15401-15405. doi:10.1007/s11356-017-9130-2 |
|          | 2017          |      | Distiller's<br>dried grains<br>with<br>solubles | Fumonisin<br>s     | 0.550       | 0.045 | 1010  | 210  | 2200 | 150 | 38 | 25.3 | Asia | Saudi<br>Arabi<br>a | HPLC  | Abudabos, A. M., Al-Atiyat, R. M., & Khan, R. U. (2017). A survey of mycotoxin contamination and chemical composition of distiller's dried grains with solubles (DDGS) imported from the USA into Saudi Arabia. Environ Sci Pollut Res Int, 24(18), 15401-15405. doi:10.1007/s11356-017-9130-2 |
| Abudabos | 2017          |      | Distiller's<br>dried grains<br>with<br>solubles | Zearalenon<br>e    | 109.6<br>50 | 8.953 | 167.6 | 33   | 501  | 150 | 52 | 34.7 | Asia | Saudi<br>Arabi<br>a | HPLC  | Abudabos, A. M., Al-Atiyat, R. M., & Khan, R. U. (2017). A survey of mycotoxin contamination and chemical composition of distiller's dried grains with solubles (DDGS) imported from the USA into Saudi Arabia. Environ Sci Pollut Res Int, 24(18), 15401-15405. doi:10.1007/s11356-017-9130-2 |
| Ismail   | 2014-<br>2015 | 2017 | Commercial<br>feed                              | Aflatoxin<br>B1    |             |       | 4.92  | 1.04 | 9.76 | 72  | 22 | 30.5 | Asia | Pakist<br>an        | ELISA | Ismail, A., Riaz, M., Akhtar, S., Yoo, S. H., Park, S., Abid, M., . . . Ahmad, Z. (2017). Seasonal variation of aflatoxin B-1 content in dairy feed. Journal of Animal and Feed Sciences, 26(1), 33-37. doi:10.22358/jafs/69008/2017                                                           |
| Ismail   | 2014-<br>2015 | 2017 | Fresh fodder                                    | Aflatoxin<br>B1    |             |       | 3.04  | 0.64 | 4.6  | 72  | 2  | 2.8  | Asia | Pakist<br>an        | ELISA | Ismail, A., Riaz, M., Akhtar, S., Yoo, S. H., Park, S., Abid, M., . . . Ahmad, Z. (2017). Seasonal variation of aflatoxin B-1 content in dairy feed. Journal of Animal and Feed Sciences, 26(1), 33-37. doi:10.22358/jafs/69008/2017                                                           |

|        |           |      |                        |                  |         |        |        |      |       |    |    |       |        |          |      |       |                                                                                                                                                                                                                                      |                                                                                                                                                                                                                                                         |
|--------|-----------|------|------------------------|------------------|---------|--------|--------|------|-------|----|----|-------|--------|----------|------|-------|--------------------------------------------------------------------------------------------------------------------------------------------------------------------------------------------------------------------------------------|---------------------------------------------------------------------------------------------------------------------------------------------------------------------------------------------------------------------------------------------------------|
| Ismail | 2014-2015 | 2017 | Leftover Bread Sample  | Aflatoxin B1     |         |        | 6.72   | 3.96 | 11.34 | 72 | 64 | 88.9  | Asia   | Pakistan |      | ELISA | Ismail, A., Riaz, M., Akhtar, S., Yoo, S. H., Park, S., Abid, M., . . . Ahmad, Z. (2017). Seasonal variation of aflatoxin B-1 content in dairy feed. Journal of Animal and Feed Sciences, 26(1), 33-37. doi:10.22358/jafs/69008/2017 |                                                                                                                                                                                                                                                         |
| Jedidi | 2011      | 2017 | Harvest time Maize     | Aflatoxin B1     | 51.545  | 16.300 | 18.98  |      |       | 10 | 4  | 40    | Africa | Tunisia  | 0.2  | 0.6   | HPLC                                                                                                                                                                                                                                 | Jedidi, I., Cruz, A., Gonzalez-Jaen, M. T., & Said, S. (2017). Aflatoxins and ochratoxin A and their Aspergillus causal species in Tunisian cereals. Food Additives & Contaminants Part B-Surveillance, 10(1), 51-58. doi:10.1080/19393210.2016.1247917 |
| Jedidi | 2011      | 2017 | Harvest time Maize     | Aflatoxin B2     | 5.439   | 1.720  | 1.93   |      |       | 10 | 4  | 40    | Africa | Tunisia  | 0.04 | 0.12  | HPLC                                                                                                                                                                                                                                 | Jedidi, I., Cruz, A., Gonzalez-Jaen, M. T., & Said, S. (2017). Aflatoxins and ochratoxin A and their Aspergillus causal species in Tunisian cereals. Food Additives & Contaminants Part B-Surveillance, 10(1), 51-58. doi:10.1080/19393210.2016.1247917 |
| Jedidi | 2011      | 2017 | Harvest time Maize     | Aflatoxin G1     | 203.967 | 64.500 | 76.01  |      |       | 10 | 9  | 90    | Africa | Tunisia  | 0.02 | 0.06  | HPLC                                                                                                                                                                                                                                 | Jedidi, I., Cruz, A., Gonzalez-Jaen, M. T., & Said, S. (2017). Aflatoxins and ochratoxin A and their Aspergillus causal species in Tunisian cereals. Food Additives & Contaminants Part B-Surveillance, 10(1), 51-58. doi:10.1080/19393210.2016.1247917 |
| Jedidi | 2011      | 2017 | Harvest time Maize     | Aflatoxin G2     | 41.489  | 13.120 | 14.56  |      |       | 10 | 8  | 80    | Africa | Tunisia  | 0.01 | 0.03  | HPLC                                                                                                                                                                                                                                 | Jedidi, I., Cruz, A., Gonzalez-Jaen, M. T., & Said, S. (2017). Aflatoxins and ochratoxin A and their Aspergillus causal species in Tunisian cereals. Food Additives & Contaminants Part B-Surveillance, 10(1), 51-58. doi:10.1080/19393210.2016.1247917 |
| Jedidi | 2011      | 2017 | Harvest time Maize     | Total Aflatoxins | 302.409 | 95.630 | 111.47 |      |       | 10 | 9  | 90    | Africa | Tunisia  |      |       | HPLC                                                                                                                                                                                                                                 | Jedidi, I., Cruz, A., Gonzalez-Jaen, M. T., & Said, S. (2017). Aflatoxins and ochratoxin A and their Aspergillus causal species in Tunisian cereals. Food Additives & Contaminants Part B-Surveillance, 10(1), 51-58. doi:10.1080/19393210.2016.1247917 |
| Jedidi | 2011      | 2017 | Postharvest time Maize | Aflatoxin B1     | 15.422  | 4.650  | 4.65   |      |       | 11 | 1  | 9.09  | Africa | Tunisia  | 0.2  | 0.6   | HPLC                                                                                                                                                                                                                                 | Jedidi, I., Cruz, A., Gonzalez-Jaen, M. T., & Said, S. (2017). Aflatoxins and ochratoxin A and their Aspergillus causal species in Tunisian cereals. Food Additives & Contaminants Part B-Surveillance, 10(1), 51-58. doi:10.1080/19393210.2016.1247917 |
| Jedidi | 2011      | 2017 | Postharvest time Maize | Aflatoxin B2     | 0.099   | 0.030  | 0.03   |      |       | 11 | 1  | 9.09  | Africa | Tunisia  | 0.04 | 0.12  | HPLC                                                                                                                                                                                                                                 | Jedidi, I., Cruz, A., Gonzalez-Jaen, M. T., & Said, S. (2017). Aflatoxins and ochratoxin A and their Aspergillus causal species in Tunisian cereals. Food Additives & Contaminants Part B-Surveillance, 10(1), 51-58. doi:10.1080/19393210.2016.1247917 |
| Jedidi | 2011      | 2017 | Postharvest time Maize | Aflatoxin G1     | 13.797  | 4.160  | 6.34   |      |       | 11 | 9  | 81.82 | Africa | Tunisia  | 0.02 | 0.06  | HPLC                                                                                                                                                                                                                                 | Jedidi, I., Cruz, A., Gonzalez-Jaen, M. T., & Said, S. (2017). Aflatoxins and ochratoxin A and their Aspergillus causal species in Tunisian cereals. Food Additives & Contaminants Part B-Surveillance, 10(1), 51-58. doi:10.1080/19393210.2016.1247917 |
| Jedidi | 2011      | 2017 | Postharvest time Maize | Aflatoxin G2     | 0.033   | 0.010  | 0.06   |      |       | 11 | 7  | 72.73 | Africa | Tunisia  | 0.01 | 0.03  | HPLC                                                                                                                                                                                                                                 | Jedidi, I., Cruz, A., Gonzalez-Jaen, M. T., & Said, S. (2017). Aflatoxins and ochratoxin A and their Aspergillus causal species in Tunisian cereals. Food Additives & Contaminants Part B-Surveillance, 10(1), 51-58. doi:10.1080/19393210.2016.1247917 |

|              |          |      |                        |                  |        |       |       |      |      |     |     |       |        |          |     |      |                                                                                                                                                                                                                                                         |                                                                                                                                                                                                                                            |
|--------------|----------|------|------------------------|------------------|--------|-------|-------|------|------|-----|-----|-------|--------|----------|-----|------|---------------------------------------------------------------------------------------------------------------------------------------------------------------------------------------------------------------------------------------------------------|--------------------------------------------------------------------------------------------------------------------------------------------------------------------------------------------------------------------------------------------|
| Jedidi       | 2011     | 2017 | Postharvest time Maize | Total Aflatoxins | 29.319 | 8.840 | 11.08 |      |      | 11  | 9   | 81.82 | Africa | Tunisi a |     | HPLC | Jedidi, I., Cruz, A., Gonzalez-Jaen, M. T., & Said, S. (2017). Aflatoxins and ochratoxin A and their Aspergillus causal species in Tunisian cereals. Food Additives & Contaminants Part B-Surveillance, 10(1), 51-58. doi:10.1080/19393210.2016.1247917 |                                                                                                                                                                                                                                            |
| Yalcin       | 2014     | 2017 | Poultry Feed           | Aflatoxin B1     |        |       |       |      |      | 73  | 23  | 32    | Asia   | Turke y  | 0.3 | 1    | LC-MC                                                                                                                                                                                                                                                   | YALCIN, N. F., ISIK, M. K., AVCI, T., OGUZ, H. & YURDUSEVEN, T. 2017. Investigation of mycotoxin residues in poultry feeds by LC MS/MS method. Ankara Universitesi Veteriner Fakultesi Dergisi, 64, 111-116.                               |
| Yalcin       | 2014     | 2017 | Poultry Feed           | Ochratoxin A     |        |       |       |      |      | 73  | 34  | 47    | Asia   | Turke y  | 0.5 | 1.25 | LC-MC                                                                                                                                                                                                                                                   | YALCIN, N. F., ISIK, M. K., AVCI, T., OGUZ, H. & YURDUSEVEN, T. 2017. Investigation of mycotoxin residues in poultry feeds by LC MS/MS method. Ankara Universitesi Veteriner Fakultesi Dergisi, 64, 111-116.                               |
| Yalcin       | 2014     | 2017 | Poultry Feed           | Fumonisin s      |        |       |       |      |      | 73  | 66  | 90    | Asia   | Turke y  | 30  | 100  | LC-MC                                                                                                                                                                                                                                                   | YALCIN, N. F., ISIK, M. K., AVCI, T., OGUZ, H. & YURDUSEVEN, T. 2017. Investigation of mycotoxin residues in poultry feeds by LC MS/MS method. Ankara Universitesi Veteriner Fakultesi Dergisi, 64, 111-116.                               |
| Yalcin       | 2014     | 2017 | Poultry Feed           | Deoxynival enol  |        |       |       |      |      | 73  | 7   | 10    | Asia   | Turke y  | 25  | 75   | LC-MC                                                                                                                                                                                                                                                   | YALCIN, N. F., ISIK, M. K., AVCI, T., OGUZ, H. & YURDUSEVEN, T. 2017. Investigation of mycotoxin residues in poultry feeds by LC MS/MS method. Ankara Universitesi Veteriner Fakultesi Dergisi, 64, 111-116.                               |
| Yalcin       | 2014     | 2017 | Poultry Feed           | Zearalenon e     |        |       |       |      |      | 73  | 28  | 38    | Asia   | Turke y  | 5   | 15   | LC-MC                                                                                                                                                                                                                                                   | YALCIN, N. F., ISIK, M. K., AVCI, T., OGUZ, H. & YURDUSEVEN, T. 2017. Investigation of mycotoxin residues in poultry feeds by LC MS/MS method. Ankara Universitesi Veteriner Fakultesi Dergisi, 64, 111-116.                               |
| Yalcin       | 2014     | 2017 | Poultry Feed           | T-2 toxin        |        |       |       |      |      | 73  | 0   | 0     | Asia   | Turke y  | 30  | 100  | LC-MC                                                                                                                                                                                                                                                   | YALCIN, N. F., ISIK, M. K., AVCI, T., OGUZ, H. & YURDUSEVEN, T. 2017. Investigation of mycotoxin residues in poultry feeds by LC MS/MS method. Ankara Universitesi Veteriner Fakultesi Dergisi, 64, 111-116.                               |
| Yalcin       | 2014     | 2017 | Poultry Feed           | HT-2 toxin       |        |       |       |      |      | 73  | 2   | 3     | Asia   | Turke y  | 30  | 100  | LC-MC                                                                                                                                                                                                                                                   | YALCIN, N. F., ISIK, M. K., AVCI, T., OGUZ, H. & YURDUSEVEN, T. 2017. Investigation of mycotoxin residues in poultry feeds by LC MS/MS method. Ankara Universitesi Veteriner Fakultesi Dergisi, 64, 111-116.                               |
| Yildirim     | 2012-203 | 2018 | Feed                   | Total Aflatoxins | 7.010  | 0.565 | 6.43  | 0.2  | 28.8 | 154 | 154 | 100   | Asia   | Turke y  |     |      | ELISA                                                                                                                                                                                                                                                   | YILDIRIM, E., MACUN, H. C., YALÇINKAYA, İ., ŞAHINDOKUYUCU KOCASARI, F. & EKICI, H. 2018. Survey of aflatoxin residue in feed and milk samples in Kırıkkale province, Turkey. Ankara Universitesi Veteriner Fakultesi Dergisi, 65, 199-204. |
| Al Khalaileh | 2016     | 2018 | Feed                   | Ochratoxin A     | 0.260  | 0.042 | 2.9   | 1.72 | 3.7  | 39  | 15  | 38    | Asia   | Jorda n  |     |      | ELISA                                                                                                                                                                                                                                                   | AL KHALAILEH, N. I. 2018. Prevalence of Ochratoxin A in Poultry Feed and Meat from Jordan. Pak J Biol Sci, 21, 239-244.                                                                                                                    |
| Al Khalaileh | 2016     | 2018 | Corn                   | Ochratoxin A     | 0.320  | 0.092 | 2.35  | 1.54 | 3.18 | 12  | 6   | 50    | Asia   | Jorda n  |     |      | ELISA                                                                                                                                                                                                                                                   | AL KHALAILEH, N. I. 2018. Prevalence of Ochratoxin A in Poultry Feed and Meat from Jordan. Pak J Biol Sci, 21, 239-244.                                                                                                                    |



|              |      |      |               |                |       |       |      |      |       |    |    |     |        |         |      |     |          |                                                                                                                                                                                                                          |
|--------------|------|------|---------------|----------------|-------|-------|------|------|-------|----|----|-----|--------|---------|------|-----|----------|--------------------------------------------------------------------------------------------------------------------------------------------------------------------------------------------------------------------------|
| Al Khalaileh | 2016 | 2018 | Feed + Sun    | Ochratoxin A   | 0.590 | 0.241 | 10.3 | 2.1  | 27.6  | 6  | 6  | 100 | Asia   | Jordan  |      |     | ELISA    | AL KHALAILEH, N. I. 2018. Prevalence of Ochratoxin A in Poultry Feed and Meat from Jordan. Pak J Biol Sci, 21, 239-244.                                                                                                  |
| Zebiri       | 2013 | 2019 | Wheat & Barn  | Ochratoxin A   | 5.800 | 1.077 | 6.95 | 0.16 | 34.75 | 29 | 22 | 76  | Africa | Algeria | 0.1  | 0.5 | HPLC-FLD | ZEBIRI, S., MOKRANE, S., VERHEECKE-VAESSEN, C., CHOQUE, E., REGHIOUI, H., SABAOU, N., MATHIEU, F. & RIBA, A. 2019. Occurrence of ochratoxin A in Algerian wheat and its milling derivatives. Toxin Reviews, 38, 206-211. |
|              |      |      |               |                |       |       |      |      |       |    |    |     |        |         |      |     |          | ZEBIRI, S., MOKRANE, S., VERHEECKE-VAESSEN, C., CHOQUE, E., REGHIOUI, H., SABAOU, N., MATHIEU, F. & RIBA, A. 2019. Occurrence of ochratoxin A in Algerian wheat and its milling derivatives. Toxin Reviews, 38, 206-211. |
| Zebiri       | 2013 | 2019 | Wheat & Barn  | Ochratoxin A   | 6.700 | 1.858 | 6.77 | 0.36 | 18.18 | 13 | 13 | 100 | Africa | Algeria | 0.15 | 0.4 | HPLC-FLD | UL HASSAN, Z., AL THANI, R., BALMAS, V., MIGHELI, Q. & JAOUA, S. 2019. Prevalence of Fusarium fungi and their toxins in marketed feed. Food Control, 104, 224-230.                                                       |
| Hassan       | 0    | 2019 | Mixed cereals | Zearalenone    |       |       | 25   |      | 75    | 16 | 14 | 88  | Asia   | Qatar   | 1.75 | 0   | ELISA    | UL HASSAN, Z., AL THANI, R., BALMAS, V., MIGHELI, Q. & JAOUA, S. 2019. Prevalence of Fusarium fungi and their toxins in marketed feed. Food Control, 104, 224-230.                                                       |
| Hassan       | 0    | 2019 | Mixed cereals | Deoxynivalenol |       |       | 158  |      | 367   | 16 | 10 | 63  | Asia   | Qatar   | 18.5 | 0   | ELISA    | UL HASSAN, Z., AL THANI, R., BALMAS, V., MIGHELI, Q. & JAOUA, S. 2019. Prevalence of Fusarium fungi and their toxins in marketed feed. Food Control, 104, 224-230.                                                       |
| Hassan       | 0    | 2019 | Mixed cereals | Fumonisin s    |       |       | 930  |      | 2360  | 16 | 16 | 100 | Asia   | Qatar   | 25   | 0   | ELISA    | UL HASSAN, Z., AL THANI, R., BALMAS, V., MIGHELI, Q. & JAOUA, S. 2019. Prevalence of Fusarium fungi and their toxins in marketed feed. Food Control, 104, 224-230.                                                       |
| Hassan       | 0    | 2019 | Maize         | Zearalenone    |       |       | 17   |      | 53    | 10 | 5  | 50  | Asia   | Qatar   | 1.75 | 0   | ELISA    | UL HASSAN, Z., AL THANI, R., BALMAS, V., MIGHELI, Q. & JAOUA, S. 2019. Prevalence of Fusarium fungi and their toxins in marketed feed. Food Control, 104, 224-230.                                                       |
| Hassan       | 0    | 2019 | Maize         | Deoxynivalenol |       |       | 60   |      | 86    | 10 | 3  | 30  | Asia   | Qatar   | 18.5 | 0   | ELISA    | UL HASSAN, Z., AL THANI, R., BALMAS, V., MIGHELI, Q. & JAOUA, S. 2019. Prevalence of Fusarium fungi and their toxins in marketed feed. Food Control, 104, 224-230.                                                       |
| Hassan       | 0    | 2019 | Maize         | Fumonisin s    |       |       | 1026 |      | 2640  | 10 | 8  | 80  | Asia   | Qatar   | 25   | 0   | ELISA    | UL HASSAN, Z., AL THANI, R., BALMAS, V., MIGHELI, Q. & JAOUA, S. 2019. Prevalence of Fusarium fungi and their toxins in marketed feed. Food Control, 104, 224-230.                                                       |
| Hassan       | 0    | 2019 | Wheat         | Zearalenone    |       |       | 8    |      | 11    | 10 | 4  | 40  | Asia   | Qatar   | 1.75 | 0   | ELISA    | UL HASSAN, Z., AL THANI, R., BALMAS, V., MIGHELI, Q. & JAOUA, S. 2019. Prevalence of Fusarium fungi and their toxins in marketed feed. Food Control, 104, 224-230.                                                       |
| Hassan       | 0    | 2019 | Wheat         | Deoxynivalenol |       |       | 122  |      | 222   | 10 | 4  | 40  | Asia   | Qatar   | 18.5 | 0   | ELISA    | UL HASSAN, Z., AL THANI, R., BALMAS, V., MIGHELI, Q. & JAOUA, S. 2019. Prevalence of Fusarium fungi and their toxins in marketed feed. Food Control, 104, 224-230.                                                       |
| Hassan       | 0    | 2019 | Wheat         | Fumonisin s    |       |       | 497  |      | 760   | 10 | 8  | 80  | Asia   | Qatar   | 25   | 0   | ELISA    | UL HASSAN, Z., AL THANI, R., BALMAS, V., MIGHELI, Q. & JAOUA, S. 2019. Prevalence of Fusarium fungi and their toxins in marketed feed. Food Control, 104, 224-230.                                                       |
| Hassan       | 0    | 2019 | Millet        | Zearalenone    |       |       | 51   |      | 143   | 7  | 3  | 43  | Asia   | Qatar   | 1.75 | 0   | ELISA    | UL HASSAN, Z., AL THANI, R., BALMAS, V., MIGHELI, Q. & JAOUA, S. 2019. Prevalence of                                                                                                                                     |

|        |      |      |          |                     |       |       |      |   |      |     |    |    |        |             |      |      |           |                                                                                                                                                                                                                                                                                                                                                                                                                     |
|--------|------|------|----------|---------------------|-------|-------|------|---|------|-----|----|----|--------|-------------|------|------|-----------|---------------------------------------------------------------------------------------------------------------------------------------------------------------------------------------------------------------------------------------------------------------------------------------------------------------------------------------------------------------------------------------------------------------------|
| Hassan | 0    | 2019 | Millet   | Deoxynival<br>enol  |       |       | 37   |   | 37   | 7   | 1  | 14 | Asia   | Qatar       | 18.5 | 0    | ELISA     | Fusarium fungi and their toxins in marketed feed. Food Control, 104, 224-230. UL HASSAN, Z., AL THANI, R., BALMAS, V., MIGHELI, Q. & JAOUA, S. 2019. Prevalence of Fusarium fungi and their toxins in marketed feed. Food Control, 104, 224-230. UL HASSAN, Z., AL THANI, R., BALMAS, V., MIGHELI, Q. & JAOUA, S. 2019. Prevalence of Fusarium fungi and their toxins in marketed feed. Food Control, 104, 224-230. |
|        | 0    | 2019 | Millet   | Fumonisin<br>s      |       |       | 38   |   | 45   | 7   | 2  | 29 | Asia   | Qatar       | 25   | 0    | ELISA     | Fusarium fungi and their toxins in marketed feed. Food Control, 104, 224-230. UL HASSAN, Z., AL THANI, R., BALMAS, V., MIGHELI, Q. & JAOUA, S. 2019. Prevalence of Fusarium fungi and their toxins in marketed feed. Food Control, 104, 224-230.                                                                                                                                                                    |
|        | 0    | 2019 | Barley   | Zearalenon<br>e     |       |       | 0    |   | 0    | 4   | 0  | 0  | Asia   | Qatar       | 1.75 | 0    | ELISA     | Fusarium fungi and their toxins in marketed feed. Food Control, 104, 224-230. UL HASSAN, Z., AL THANI, R., BALMAS, V., MIGHELI, Q. & JAOUA, S. 2019. Prevalence of Fusarium fungi and their toxins in marketed feed. Food Control, 104, 224-230.                                                                                                                                                                    |
|        | 0    | 2019 | Barley   | Deoxynival<br>enol  |       |       | 48   |   | 75   | 4   | 2  | 50 | Asia   | Qatar       | 18.5 | 0    | ELISA     | Fusarium fungi and their toxins in marketed feed. Food Control, 104, 224-230. UL HASSAN, Z., AL THANI, R., BALMAS, V., MIGHELI, Q. & JAOUA, S. 2019. Prevalence of Fusarium fungi and their toxins in marketed feed. Food Control, 104, 224-230.                                                                                                                                                                    |
|        | 0    | 2019 | Barley   | Fumonisin<br>s      |       |       | 553  |   | 553  | 4   | 1  | 25 | Asia   | Qatar       | 25   | 0    | ELISA     | Fusarium fungi and their toxins in marketed feed. Food Control, 104, 224-230. UL HASSAN, Z., AL THANI, R., BALMAS, V., MIGHELI, Q. & JAOUA, S. 2019. Prevalence of Fusarium fungi and their toxins in marketed feed. Food Control, 104, 224-230.                                                                                                                                                                    |
|        | 0    | 2019 | Soybeans | Zearalenon<br>e     |       |       | 0    |   | 0    | 6   | 0  | 0  | Asia   | Qatar       | 1.75 | 0    | ELISA     | Fusarium fungi and their toxins in marketed feed. Food Control, 104, 224-230. UL HASSAN, Z., AL THANI, R., BALMAS, V., MIGHELI, Q. & JAOUA, S. 2019. Prevalence of Fusarium fungi and their toxins in marketed feed. Food Control, 104, 224-230.                                                                                                                                                                    |
|        | 0    | 2019 | Soybeans | Deoxynival<br>enol  |       |       | 38   |   | 49   | 6   | 4  | 67 | Asia   | Qatar       | 18.5 | 0    | ELISA     | Fusarium fungi and their toxins in marketed feed. Food Control, 104, 224-230. UL HASSAN, Z., AL THANI, R., BALMAS, V., MIGHELI, Q. & JAOUA, S. 2019. Prevalence of Fusarium fungi and their toxins in marketed feed. Food Control, 104, 224-230.                                                                                                                                                                    |
|        | 0    | 2019 | Soybeans | Fumonisin<br>s      |       |       | 0    |   | 0    | 6   | 0  | 0  | Asia   | Qatar       | 25   | 0    | ELISA     | Fusarium fungi and their toxins in marketed feed. Food Control, 104, 224-230. UL HASSAN, Z., AL THANI, R., BALMAS, V., MIGHELI, Q. & JAOUA, S. 2019. Prevalence of Fusarium fungi and their toxins in marketed feed. Food Control, 104, 224-230.                                                                                                                                                                    |
|        | 0    | 2019 | Soybeans | Total<br>Aflatoxins | 7.000 | 0.868 | 4.13 | 1 | 30.2 | 65  | 47 | 72 | Asia   | Yeme<br>n   | 0    | 0    | ELISA     | MURSHED, S. A. A., BACHA, N. & ALHARAZI, T. 2019. Detection of Total Aflatoxins in Groundnut and Soybean Samples in Yemen Using Enzyme-Linked Immunosorbent Assay. Journal of Food Quality.                                                                                                                                                                                                                         |
| Juan   | 2019 | 2019 | Feed     | Aflatoxin<br>B1     |       |       | 0    |   | 0    | 122 | 0  | 0  | Africa | Tunisi<br>a | 1.68 | 5.6  | LC-<br>MC | JUAN, C., OUESLATI, S., MANES, J. & BERRADA, H. 2019. Multimycotoxin Determination in Tunisian Farm Animal Feed. Journal of Food Science, 84, 3885-3893.                                                                                                                                                                                                                                                            |
| Juan   | 2019 | 2019 | Feed     | Aflatoxin<br>B2     |       |       | 0    |   | 0    | 122 | 0  | 0  | Africa | Tunisi<br>a | 1.84 | 6.13 | LC-<br>MC | JUAN, C., OUESLATI, S., MANES, J. & BERRADA, H. 2019. Multimycotoxin Determination in Tunisian Farm Animal Feed. Journal of Food Science, 84, 3885-3893.                                                                                                                                                                                                                                                            |
| Juan   | 2019 | 2019 | Feed     | Aflatoxin<br>G1     |       |       | 0    |   | 0    | 122 | 0  | 0  | Africa | Tunisi<br>a | 1.59 | 5.29 | LC-<br>MC | JUAN, C., OUESLATI, S., MANES, J. & BERRADA, H. 2019. Multimycotoxin Determination in Tunisian Farm Animal Feed. Journal of Food Science, 84, 3885-3893.                                                                                                                                                                                                                                                            |

|         |           |      |              |                  |        |       |        |      |       |     |     |    |        |          |           |           |       |                                                                                                                                                                                                                                                                                        |
|---------|-----------|------|--------------|------------------|--------|-------|--------|------|-------|-----|-----|----|--------|----------|-----------|-----------|-------|----------------------------------------------------------------------------------------------------------------------------------------------------------------------------------------------------------------------------------------------------------------------------------------|
| Juan    | 2019      | 2019 | Feed         | Aflatoxin G2     |        |       | 8.49   |      | 42.47 | 122 | 1   | 1  | Africa | Tunisi a | 2.09      | 7.64      | LC-MC | JUAN, C., OUESLATI, S., MANES, J. & BERRADA, H. 2019. Multimycotoxin Determination in Tunisian Farm Animal Feed. Journal of Food Science, 84, 3885-3893.                                                                                                                               |
| Juan    | 2019      | 2019 | Feed         | Ochratoxin A     | 0.520  | 0.047 | 1.92   |      | 6.69  | 122 | 7   | 6  | Africa | Tunisi a | 0.84      | 2.81      | LC-MC | JUAN, C., OUESLATI, S., MANES, J. & BERRADA, H. 2019. Multimycotoxin Determination in Tunisian Farm Animal Feed. Journal of Food Science, 84, 3885-3893.                                                                                                                               |
| Juan    | 2019      | 2019 | Feed         | Deoxynivalenol   | 16.500 | 1.494 | 94.81  |      | 249   | 122 | 75  | 61 | Africa | Tunisi a | 1.31      | 4.38      | GC-MC | JUAN, C., OUESLATI, S., MANES, J. & BERRADA, H. 2019. Multimycotoxin Determination in Tunisian Farm Animal Feed. Journal of Food Science, 84, 3885-3893.                                                                                                                               |
| Juan    | 2019      | 2019 | Feed         | T-2 toxin        | 7.380  | 0.668 | 202.28 |      | 956   | 122 | 5   | 4  | Africa | Tunisi a | 4.36      | 8.53      | GC-MC | JUAN, C., OUESLATI, S., MANES, J. & BERRADA, H. 2019. Multimycotoxin Determination in Tunisian Farm Animal Feed. Journal of Food Science, 84, 3885-3893.                                                                                                                               |
| Juan    | 2019      | 2019 | Feed         | HT-2 toxin       | 10.020 | 0.907 | 34.4   |      | 119.2 | 122 | 24  | 20 | Africa | Tunisi a | 1.97      | 6.55      | GC-MC | JUAN, C., OUESLATI, S., MANES, J. & BERRADA, H. 2019. Multimycotoxin Determination in Tunisian Farm Animal Feed. Journal of Food Science, 84, 3885-3893.                                                                                                                               |
| Juan    | 2019      | 2019 | Feed         | Zearalenone      | 6.230  | 0.564 | 19.13  |      | 77.4  | 122 | 4   | 3  | Africa | Tunisi a | 12.94     | 3.43      | LC-MC | JUAN, C., OUESLATI, S., MANES, J. & BERRADA, H. 2019. Multimycotoxin Determination in Tunisian Farm Animal Feed. Journal of Food Science, 84, 3885-3893.                                                                                                                               |
| Iram    | 2015-2016 | 2019 | Poultry Feed | Total Aflatoxins | 24.281 | 1.700 | 25.51  | 4.23 | 72.27 | 204 | 132 | 65 | Asia   | Pskistan | 0         | 0         | ELISA | IRAM, S., FAREED, S. K., CHAUDHARY, M., IQBAL, M. U. N., GHANI, R., KHAN, T. A. & ABBAS, T. 2019. Identification of Aspergillus flavus and aflatoxin in home mix layer poultry feed in relation to seasons in Karachi, Pakistan. Tropical Animal Health and Production, 51, 1321-1327. |
| Aballah | 2014-2015 | 2019 | Maize        | Aflatoxin B1     |        |       | 8.7    | 0.2  | 44.9  | 61  | 15  | 25 | Africa | Egypt    | 0.04-0.12 | 0.12-0.39 | HPLC  | ABDALLAH, M. F., GIRGIN, G. & BAYDAR, T. 2019. Mycotoxin Detection in Maize, Commercial Feed, and Raw Dairy Milk Samples from Assiut City, Egypt. Vet Sci, 6.                                                                                                                          |
| Aballah | 2014-2016 | 2019 | Maize        | Aflatoxin B2     |        |       | 2.2    | 0.1  | 7     | 61  | 6   | 10 | Africa | Egypt    | 0.04-0.13 | 0.12-0.40 | HPLC  | ABDALLAH, M. F., GIRGIN, G. & BAYDAR, T. 2019. Mycotoxin Detection in Maize, Commercial Feed, and Raw Dairy Milk Samples from Assiut City, Egypt. Vet Sci, 6.                                                                                                                          |
| Aballah | 2014-2017 | 2019 | Maize        | Aflatoxin G1     |        |       | 0      |      | 0     | 61  | 0   | 0  | Africa | Egypt    | 0         | 0         | HPLC  | ABDALLAH, M. F., GIRGIN, G. & BAYDAR, T. 2019. Mycotoxin Detection in Maize, Commercial Feed, and Raw Dairy Milk Samples from Assiut City, Egypt. Vet Sci, 6.                                                                                                                          |
| Aballah | 2014-2018 | 2019 | Maize        | Aflatoxin G2     |        |       | 0      |      | 0     | 61  | 0   | 0  | Africa | Egypt    | 0         | 0         | HPLC  | ABDALLAH, M. F., GIRGIN, G. & BAYDAR, T. 2019. Mycotoxin Detection in Maize, Commercial Feed, and Raw Dairy Milk Samples from Assiut City, Egypt. Vet Sci, 6.                                                                                                                          |
| Aballah | 2014-2019 | 2019 | Maize        | Ochratoxin A     |        |       | 0      |      | 0     | 61  | 0   | 0  | Africa | Egypt    | 0         | 0         | HPLC  | ABDALLAH, M. F., GIRGIN, G. & BAYDAR, T. 2019. Mycotoxin Detection in Maize, Commercial Feed, and Raw Dairy Milk Samples from Assiut City, Egypt. Vet Sci, 6.                                                                                                                          |

|         |           |      |                  |              |       |       |     |     |      |     |    |    |        |          |           |           |       |                                                                                                                                                                                              |
|---------|-----------|------|------------------|--------------|-------|-------|-----|-----|------|-----|----|----|--------|----------|-----------|-----------|-------|----------------------------------------------------------------------------------------------------------------------------------------------------------------------------------------------|
| Aballah | 2014-2020 | 2019 | Maize            | Zearalenone  |       |       | 0   |     | 0    | 61  | 0  | 0  | Africa | Egypt    | 0         | 0         | HPLC  | ABDALLAH, M. F., GIRGIN, G. & BAYDAR, T. 2019. Mycotoxin Detection in Maize, Commercial Feed, and Raw Dairy Milk Samples from Assiut City, Egypt. Vet Sci, 6.                                |
| Aballah | 2014-2015 | 2019 | Feed             | Aflatoxin B1 |       |       | 1.5 | 0.1 | 5.9  | 17  | 8  | 47 | Africa | Egypt    | 0.04-0.12 | 0.12-0.39 | HPLC  | ABDALLAH, M. F., GIRGIN, G. & BAYDAR, T. 2019. Mycotoxin Detection in Maize, Commercial Feed, and Raw Dairy Milk Samples from Assiut City, Egypt. Vet Sci, 6.                                |
| Aballah | 2014-2016 | 2019 | Feed             | Aflatoxin B2 |       |       | 0.5 |     | 0.5  | 17  | 1  | 6  | Africa | Egypt    | 0.04-0.13 | 0.12-0.40 | HPLC  | ABDALLAH, M. F., GIRGIN, G. & BAYDAR, T. 2019. Mycotoxin Detection in Maize, Commercial Feed, and Raw Dairy Milk Samples from Assiut City, Egypt. Vet Sci, 6.                                |
| Aballah | 2014-2017 | 2019 | Feed             | Aflatoxin G1 |       |       | 0   |     | 0    | 17  | 0  | 0  | Africa | Egypt    | 0         | 0         | HPLC  | ABDALLAH, M. F., GIRGIN, G. & BAYDAR, T. 2019. Mycotoxin Detection in Maize, Commercial Feed, and Raw Dairy Milk Samples from Assiut City, Egypt. Vet Sci, 6.                                |
| Aballah | 2014-2018 | 2019 | Feed             | Aflatoxin G2 |       |       | 0   |     | 0    | 17  | 0  | 0  | Africa | Egypt    | 0         | 0         | HPLC  | ABDALLAH, M. F., GIRGIN, G. & BAYDAR, T. 2019. Mycotoxin Detection in Maize, Commercial Feed, and Raw Dairy Milk Samples from Assiut City, Egypt. Vet Sci, 6.                                |
| Aballah | 2014-2019 | 2019 | Feed             | Ochratoxin A |       |       | 0   |     | 0    | 17  | 0  | 0  | Africa | Egypt    | 0         | 0         | HPLC  | ABDALLAH, M. F., GIRGIN, G. & BAYDAR, T. 2019. Mycotoxin Detection in Maize, Commercial Feed, and Raw Dairy Milk Samples from Assiut City, Egypt. Vet Sci, 6.                                |
| Aballah | 2014-2020 | 2019 | Feed             | Zearalenone  |       |       | 8.1 | 1   | 11.9 | 17  | 4  | 24 | Africa | Egypt    | 0.92      | 2.8       | HPLC  | ABDALLAH, M. F., GIRGIN, G. & BAYDAR, T. 2019. Mycotoxin Detection in Maize, Commercial Feed, and Raw Dairy Milk Samples from Assiut City, Egypt. Vet Sci, 6.                                |
| shar    | 2019      | 2020 | Cotton seed      | Aflatoxin B1 | 2.770 | 0.264 | 41  |     | 90   | 110 | 88 | 80 | Asia   | Pakistan | 0.25      | 0.71      | ELISA | SHAR, Z. H., PIRKASH, O., SHAR, H. H., SHERAZI, S. T. H. & MAHESAR, S. A. 2020. Aflatoxins in cotton seeds and cotton seed cake from Pakistan. Food Addit Contam Part B Surveill, 13, 72-76. |
| shar    | 2019      | 2020 | Cotton seed      | Aflatoxin G1 | 3.160 | 0.301 | 7   |     | 10   | 110 | 56 | 51 | Asia   | Pakistan | 0.16      | 0.47      | ELISA | SHAR, Z. H., PIRKASH, O., SHAR, H. H., SHERAZI, S. T. H. & MAHESAR, S. A. 2020. Aflatoxins in cotton seeds and cotton seed cake from Pakistan. Food Addit Contam Part B Surveill, 13, 72-76. |
| shar    | 2019      | 2020 | Cotton seed      | Aflatoxin B2 | 3.280 | 0.313 | 16  |     | 31   | 110 | 66 | 60 | Asia   | Pakistan | 0.3       | 0.9       | ELISA | SHAR, Z. H., PIRKASH, O., SHAR, H. H., SHERAZI, S. T. H. & MAHESAR, S. A. 2020. Aflatoxins in cotton seeds and cotton seed cake from Pakistan. Food Addit Contam Part B Surveill, 13, 72-76. |
| shar    | 2019      | 2020 | Cotton seed      | Aflatoxin G2 | 3.220 | 0.307 | 5   |     | 8    | 110 | 33 | 30 | Asia   | Pakistan | 0.2       | 0.58      | ELISA | SHAR, Z. H., PIRKASH, O., SHAR, H. H., SHERAZI, S. T. H. & MAHESAR, S. A. 2020. Aflatoxins in cotton seeds and cotton seed cake from Pakistan. Food Addit Contam Part B Surveill, 13, 72-76. |
| shar    | 2019      | 2020 | Cotton seed cake | Aflatoxin B1 | 2.990 | 0.285 | 43  |     | 150  | 110 | 97 | 88 | Asia   | Pakistan | 0.3       | 0.91      | ELISA | SHAR, Z. H., PIRKASH, O., SHAR, H. H., SHERAZI, S. T. H. & MAHESAR, S. A. 2020. Aflatoxins in cotton seeds and cotton seed cake                                                              |

|                                                                                                                                                                                   |           |      |                    |                |         |        |       |      |       |     |    |    |        |          |      |      |          |                                                                                                                                                                                                                                                                                                                                                                                                                                                              |
|-----------------------------------------------------------------------------------------------------------------------------------------------------------------------------------|-----------|------|--------------------|----------------|---------|--------|-------|------|-------|-----|----|----|--------|----------|------|------|----------|--------------------------------------------------------------------------------------------------------------------------------------------------------------------------------------------------------------------------------------------------------------------------------------------------------------------------------------------------------------------------------------------------------------------------------------------------------------|
| <div> <div>shar</div> <div>shar</div> <div>shar</div> <div>juan</div> <div>juan</div> <div>Waqas</div> <div>Waqas</div> <div>Waqas</div> <div>Waqas</div> <div>Waqas</div> </div> |           |      |                    |                |         |        |       |      |       |     |    |    |        |          |      |      |          | from Pakistan. Food Addit Contam Part B Surveill, 13, 72-76.<br>SHAR, Z. H., PIRKASH, O., SHAR, H. H., SHERAZI, S. T. H. & MAHESAR, S. A. 2020. Aflatoxins in cotton seeds and cotton seed cake from Pakistan. Food Addit Contam Part B Surveill, 13, 72-76.<br>SHAR, Z. H., PIRKASH, O., SHAR, H. H., SHERAZI, S. T. H. & MAHESAR, S. A. 2020. Aflatoxins in cotton seeds and cotton seed cake from Pakistan. Food Addit Contam Part B Surveill, 13, 72-76. |
|                                                                                                                                                                                   | 2019      | 2020 | Cotton seed cake   | Aflatoxin G1   | 3.360   | 0.320  | 10    |      | 20    | 110 | 58 | 53 | Asia   | Pakistan | 0.28 | 0.88 | ELISA    |                                                                                                                                                                                                                                                                                                                                                                                                                                                              |
|                                                                                                                                                                                   | 2019      | 2020 | Cotton seed cake   | Aflatoxin B2   | 3.400   | 0.324  | 29    |      | 81    | 110 | 84 | 76 | Asia   | Pakistan | 0.19 | 0.57 | ELISA    |                                                                                                                                                                                                                                                                                                                                                                                                                                                              |
|                                                                                                                                                                                   | 2019      | 2020 | Cotton seed cake   | Aflatoxin G2   | 3.210   | 0.306  | 7     |      | 18    | 110 | 62 | 56 | Asia   | Pakistan | 0.1  | 0.3  | ELISA    |                                                                                                                                                                                                                                                                                                                                                                                                                                                              |
|                                                                                                                                                                                   | 2018      | 2020 | silage             | HT-2 toxin     | 78.000  | 13.789 | 5.3   |      | 116   | 32  | 3  | 9  | Africa | Tunisia  | 1.97 | 6.55 | GC-MC    | JUAN, C., MANNAI, A., BEN SALEM, H., OUESLATI, S., BERRADA, H., JUAN-GARCIA, A. & MANES, J. 2020. Mycotoxins presence in pre- and post-fermented silage from Tunisia. Arabian Journal of Chemistry, 13, 6753-6761.                                                                                                                                                                                                                                           |
|                                                                                                                                                                                   | 2018      | 2020 | silage             | Deoxynivalenol | 538.000 | 95.106 | 153.9 |      | 915.9 | 32  | 9  | 28 | Africa | Tunisia  | 1.31 | 4.38 | GC-MC    | JUAN, C., MANNAI, A., BEN SALEM, H., OUESLATI, S., BERRADA, H., JUAN-GARCIA, A. & MANES, J. 2020. Mycotoxins presence in pre- and post-fermented silage from Tunisia. Arabian Journal of Chemistry, 13, 6753-6761.                                                                                                                                                                                                                                           |
|                                                                                                                                                                                   | 2017-2018 | 2021 | Mustard oil cake   | Aflatoxin B1   | 4.500   | 0.795  | 25    | 0.03 | 150.8 | 32  | 22 | 69 | Asia   | Pakistan | 0.03 | 0.1  | HPLC-FLD | WAQAS, M., PERVAIZ, W., ZIA, K. M. & IQBAL, S. Z. 2021. Assessment of aflatoxin B-1 in animal feed and aflatoxin M-1 in raw milk samples of different species of milking animals from Punjab, Pakistan. Journal of Food Safety, 41.                                                                                                                                                                                                                          |
|                                                                                                                                                                                   | 2017-2018 | 2021 | Soybean oil cake   | Aflatoxin B2   | 4.500   | 0.822  | 13.5  | 0.03 | 120.5 | 30  | 20 | 67 | Asia   | Pakistan | 0.03 | 0.1  | HPLC-FLD | WAQAS, M., PERVAIZ, W., ZIA, K. M. & IQBAL, S. Z. 2021. Assessment of aflatoxin B-1 in animal feed and aflatoxin M-1 in raw milk samples of different species of milking animals from Punjab, Pakistan. Journal of Food Safety, 41.                                                                                                                                                                                                                          |
|                                                                                                                                                                                   | 2017-2018 | 2021 | Corn oil cake      | Aflatoxin B3   | 6.700   | 1.117  | 20.1  | 0.03 | 180.5 | 36  | 19 | 53 | Asia   | Pakistan | 0.03 | 0.1  | HPLC-FLD | WAQAS, M., PERVAIZ, W., ZIA, K. M. & IQBAL, S. Z. 2021. Assessment of aflatoxin B-1 in animal feed and aflatoxin M-1 in raw milk samples of different species of milking animals from Punjab, Pakistan. Journal of Food Safety, 41.                                                                                                                                                                                                                          |
|                                                                                                                                                                                   | 2017-2018 | 2021 | Sunflower oil cake | Aflatoxin B4   | 4.900   | 0.828  | 17.2  | 0.03 | 110.5 | 35  | 25 | 71 | Asia   | Pakistan | 0.03 | 0.1  | HPLC-FLD | WAQAS, M., PERVAIZ, W., ZIA, K. M. & IQBAL, S. Z. 2021. Assessment of aflatoxin B-1 in animal feed and aflatoxin M-1 in raw milk samples of different species of milking animals from Punjab, Pakistan. Journal of Food Safety, 41.                                                                                                                                                                                                                          |
|                                                                                                                                                                                   | 2017-2018 | 2021 | Cotton seeds       | Aflatoxin B5   | 2.800   | 0.560  | 17.7  | 0.03 | 180.5 | 25  | 19 | 76 | Asia   | Pakistan | 0.03 | 0.1  | HPLC-FLD | WAQAS, M., PERVAIZ, W., ZIA, K. M. & IQBAL, S. Z. 2021. Assessment of aflatoxin B-1 in animal feed and aflatoxin M-1 in raw milk samples of                                                                                                                                                                                                                                                                                                                  |



Waqas

2017-2018

2021

Dry wheat bread

Aflatoxin B6

5.700

0.963

15.2

0.03

80.5

35

21

60

Asia

Pakistan

0.03

0.1

HPLC-FLD

different species of milking animals from Punjab, Pakistan. Journal of Food Safety, 41.  
WAQAS, M., PERVAIZ, W., ZIA, K. M. & IQBAL, S. Z. 2021. Assessment of aflatoxin B-1 in animal feed and aflatoxin M-1 in raw milk samples of different species of milking animals from Punjab, Pakistan. Journal of Food Safety, 41.
